## RESEARCH ARTICLE

# Hypothalamic sonic hedgehog is required for cell specification and proliferation of LHX3/LHX4 pituitary embryonic precursors

Gabriela Carreno<sup>1</sup>, John R. Apps<sup>1</sup>, Emily J. Lodge<sup>2</sup>, Leonidas Panousopoulos<sup>1</sup>, Scott Haston<sup>1</sup>, Jose Mario Gonzalez-Meljem<sup>\*1</sup>, Heidi Hahn<sup>3</sup>, Cynthia L. Andoniadou<sup>2,4</sup> and Juan Pedro Martinez-Barbera<sup>1,§</sup>

## ABSTRACT

Sonic hedgehog (SHH) is an essential morphogenetic signal that dictates cell fate decisions in several developing organs in mammals. *In vitro* data suggest that SHH is required to specify LHX3<sup>+</sup>/LHX4<sup>+</sup> Rathke's pouch (RP) progenitor identity. However, *in vivo* studies have failed to reveal such a function, supporting instead a crucial role for SHH in promoting proliferation of these RP progenitors and for differentiation of pituitary cell types. Here, we have used a genetic approach to demonstrate that activation of the SHH pathway is necessary to induce LHX3<sup>+</sup>/LHX4<sup>+</sup> RP identity in mouse embryos. First, we show that conditional deletion of *Shh* in the anterior hypothalamus results in a fully penetrant phenotype characterised by a complete arrest of RP development, with lack of *Lhx3/Lhx4* expression in RP epithelium at 9.0 days post coitum (dpc) and total loss of pituitary tissue by 12.5 dpc. Conversely, overactivation of the SHH pathway by conditional deletion of *Ptch1* in RP progenitors leads to severe hyperplasia and enlargement of the Sox2<sup>+</sup> stem cell compartment by the end of gestation.

**KEY WORDS:** Pituitary, Mouse, Sonic hedgehog, Patched

## INTRODUCTION

Together, the pituitary gland and hypothalamus serve as the main regulator of the neuroendocrine axis, controlling crucial physiological processes such as growth, reproduction, metabolism and the stress response. The vertebrate pituitary comprises the anterior pituitary (AP), including the anterior and intermediate lobes (AL and IL, respectively), and the posterior pituitary (PP). The AP derives from Rathke's pouch (RP), a dorsal elevation of the oral ectoderm near the boundary with the pharyngeal endoderm, whereas the PP is of neural origin and originates from a recess of the overlying hypothalamus: the presumptive infundibulum (Davis and Camper, 2007; Rizzoti, 2015; Takuma et al., 1998; Treier et al., 1998). Progenitors in the periluminal epithelium of RP proliferate rapidly from 12.5 to 14.5 dpc, to subsequently exit the cell cycle and initiate cell-lineage commitment and differentiation into the different

hormone-producing cells (Bilodeau et al., 2009; Davis et al., 2011). The AP contains six main hormone-secreting cell types: somatotrophs (growth hormone, GH), lactotrophs (prolactin, PRL), corticotrophs (adrenocorticotrophic hormone, ACTH), thyrotrophs (thyroid stimulating hormone, TSH), gonadotrophs (luteinising hormone, LH; follicle stimulating hormone, FSH) and melanotrophs (melanocyte-stimulating hormone, MSH). In addition, the AP contains Sox2<sup>+</sup> stem cells, which contribute to the postnatal expansion of the gland and to organ homeostasis (Andoniadou et al., 2013; Rizzoti et al., 2013). The PP contains no endocrine cell types, but is instead richly endowed with axonal projections from hypothalamic neurons (Andersen and Rosenfeld, 2001; Castinetti et al., 2011; Kelberman et al., 2009). The function of the AP is primarily regulated by the parvocellular and magnocellular neurons, which reside in distinct nuclei in the hypothalamus (Andersen and Rosenfeld, 2001; Burbridge et al., 2016; Shimogori et al., 2010).

RP development is thought to be a step-wise process that requires at least two sequential inductive signals from the diencephalon (Takuma et al., 1998): first, BMP4 is required for induction and formation of a pouch rudiment; second, FGF8 signalling is necessary for activation of *Lhx3* and subsequent development of the pouch rudiment into a definitive RP (Takuma et al., 1998). Indeed, genetic evidence suggests that the acquisition of RP progenitor identity depends on the activation of *Lhx3* and *Lhx4* in the pouch rudiment epithelium at 9.0 dpc (Sheng et al., 1996, 1997). Embryos homozygous null for *Lhx3* and *Lhx4* show early RP developmental arrest, where only a rudimentary pouch is formed. No pituitary tissue is recognisable beyond 15.5 dpc, possibly owing to decreased proliferation (Sheng et al., 1997) and/or increased apoptosis (Ellsworth et al., 2008; Raetzman et al., 2002; Zhao et al., 2006). Furthermore, double homozygous null embryos for *Pitx1* and *Pitx2*, two transcription factors expressed in the oral ectoderm and RP at 9.0 dpc, fail to activate *Lhx3/Lhx4* expression, resulting in severe RP developmental arrest (Charles et al., 2005; Suh et al., 2002).

Several *in vitro* and *in vivo* studies have established a crucial role for hypothalamic expression of BMP4 and FGFs for activation of *Lhx3/Lhx4* expression in RP epithelium (Davis and Camper, 2007; Ericson et al., 1998; Gleiberman et al., 1999; Norlin et al., 2000; Ohuchi et al., 2000; Ozone et al., 2016; Revest et al., 2001; Sbrogna et al., 2003; Suga et al., 2011; Takuma et al., 1998; Treier et al., 1998, 2001). In contrast, definitive *in vivo* evidence for a similar role for SHH is lacking. Genetic experiments in zebrafish and mouse have provided evidence supporting a role for Hedgehog signalling in the proliferation of LHX3<sup>+</sup>/LHX4<sup>+</sup> RP progenitors rather than in the initial induction of RP identity (i.e. activation of *Lhx3* and *Lhx4* expression) (Dutta et al., 2005; Herzog et al., 2003; Karlstrom et al., 1999; Park et al., 2000; Treier et al., 2001; Wang et al., 2010). Overexpression of the SHH inhibitor *Hhip* under the control the *Pitx1* promoter does not prevent the activation of *Lhx3/Lhx4* or formation of a

<sup>1</sup>Developmental Biology and Cancer Programme, Birth Defects Research Centre, Great Ormond Street Institute of Child Health, University College London, London WC1N 1EH, UK. <sup>2</sup>Centre for Craniofacial and Regenerative Biology, King's College London, London SE1 9RT, UK. <sup>3</sup>Institute of Human Genetics, Tumor Genetics Group, University of Göttingen, 37073 Göttingen, Germany. <sup>4</sup>Department of Internal Medicine III, Technische Universität Dresden, 01307 Dresden, Germany. <sup>\*</sup>Present address: Basic Research Department, National Institute of Geriatrics, Blvd. Adolfo Ruiz Cortines 2767, Mexico City, P.C.10200, Mexico.

<sup>§</sup>Author for correspondence (j.martinez-barbera@ucl.ac.uk)

 J.P.M.-B., 0000-0002-5292-7276; J.R.A., 0000-0001-7902-482X; C.L.A., 0000-0003-4311-5855

definitive RP, but results in pituitary hypoplasia (Treier et al., 1998). Conversely, overexpression of *Shh* leads to pituitary hyperplasia, suggesting a proliferative role for SHH on already specified LHX3<sup>+</sup>/LHX4<sup>+</sup> RP progenitors. More recently, the anterior hypothalamic expression of *Shh* has been conditionally deleted using a specific SOX2-binding enhancer-Cre (*SBE2-Cre*) (Zhao et al., 2012). This leads to mis-patterning of the hypothalamus and RP hypoplasia, but *Lhx3/Lhx4* expression occurs in RP epithelium. In fact, in some embryos, multiple LHX3<sup>+</sup>/LHX4<sup>+</sup> pouches were observed. Genetic ablation in mice supports a crucial role for *Gli* factors during hypothalamo-pituitary development but the exact mechanisms are still not fully clarified (Park et al., 2000; Wang et al., 2010).

In this manuscript, we have used genetic approaches in mouse to demonstrate that, in addition to promoting RP progenitor proliferation, hypothalamic *Shh* expression is essential for the initial activation of *Lhx3/Lhx4* transcription in RP epithelium and formation of a definitive pouch. In addition, we show that the anterior hypothalamus fails to differentiate.

## RESULTS

### The SHH pathway is active throughout normal pituitary development in mice and humans

First, we performed a detailed study to assess the expression of mouse *Shh*/SHH and human *SHH*, and their effector target genes

*Gli1/GLI1* and *Ptch1/PTCH1* throughout pituitary development in both mice and humans. At 9.5 and 10.5 dpc, *Shh* transcripts were detected within a rostral neural domain, including the developing anterior hypothalamus and ventral telencephalon, and in a caudal domain that encompassed the posterior hypothalamus, possibly the mammillary area and adjacent floorplate of the midbrain. There is a *Shh*-negative area between the mammillary region and anterior hypothalamus, likely corresponding to the tuberal hypothalamus (Fig. 1A,B). At these stages, *Shh* expression was also observed in the pharyngeal endoderm immediately posterior to the developing RP, which was devoid of any *Shh* expression (Fig. 1A,B). Although *Shh* expression was initially reported to be expressed in the oral ectoderm of wild-type embryos at 9.5-10.5 dpc (Treier et al., 1998, 2001), we could not detect the presence of *Shh* transcripts in this layer medially between 9.5 and 10.5 dpc, in agreement with a recent report (Zhao et al., 2012). To clarify further this discrepancy and assess the timing of *Shh* expression in the oral ectoderm, we performed a detailed expression analysis on histological sections of wild-type embryos from 16-46 somites (i.e. 9.0 to 11.5 dpc) (Hogan et al., 1994) (Fig. S1). By staging the embryos by somite number, we aimed to accurately pinpoint the onset of *Shh* expression in this tissue. This study revealed that *Shh* mRNA is first detected in the lateral oral ectoderm adjacent to the developing RP in 33-somite-stage embryos (10.0 dpc) (Fig. S1E'). Strong expression in the lateral oral ectoderm was more evident at 42 and 46 somites (11-

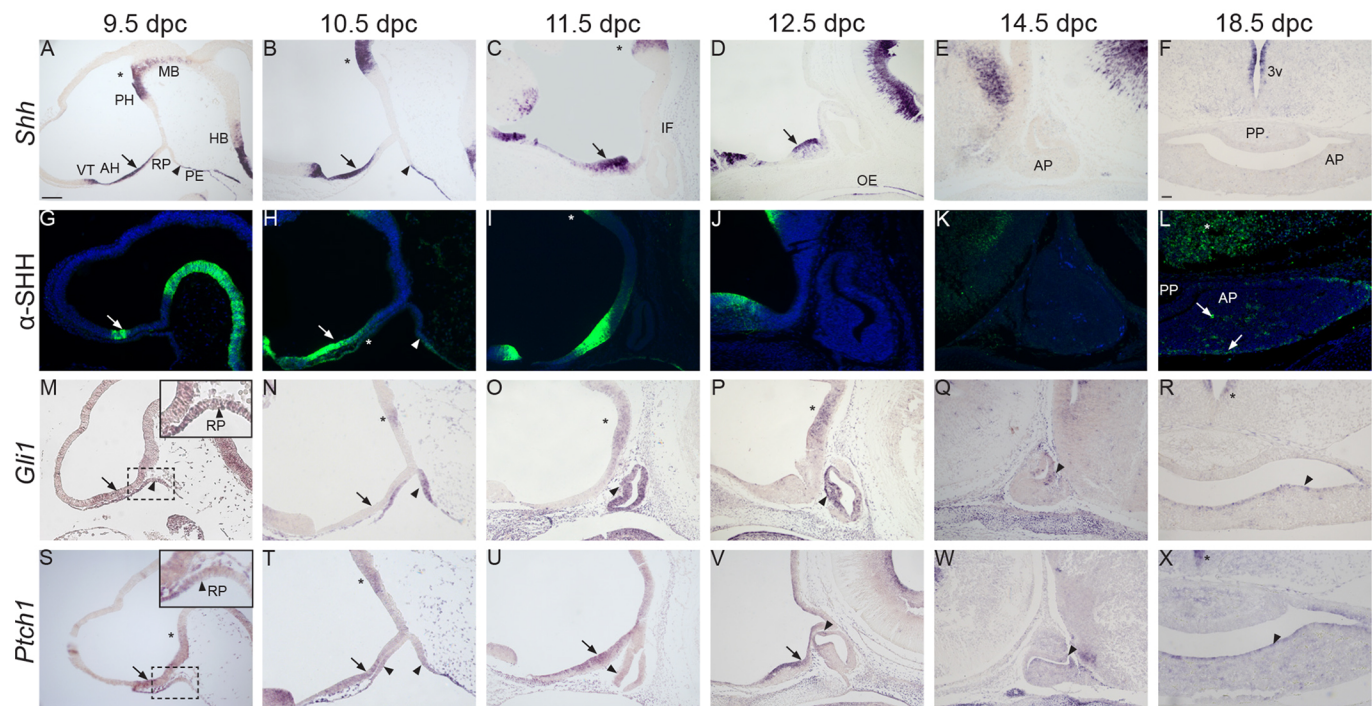

**Fig. 1. Expression of *Shh*/SHH, *Gli1* and *Ptch1* during normal pituitary development.** *In situ* hybridisation and immunofluorescence on wild-type mid-sagittal (A-E, G-K, M-Q, S-W) and frontal sections (F, L, R, X) during pituitary organogenesis between 9.5 and 18.5 dpc. (A-F) *Shh* transcripts are detected in the anterior hypothalamus (AH, arrows), posterior hypothalamus (PH, asterisks) and pharyngeal endoderm (PE, arrowhead) abutting the developing Rathke's pouch (RP). Note the expression in the subventricular zone around the 3rd ventricle (3v). (G-L) SHH immunostaining is observed in a similar pattern. Note the weak SHH signal in the anterior region of RP at 10.5 dpc (H, asterisk). Single SHH<sup>+</sup> cells are detected at 18.5 dpc in the AP (arrows) and overlying hypothalamus (asterisk in L). (M-R) *In situ* hybridisation for *Gli1*. Note the expression of *Gli1* in the developing RP (M-O, arrowheads), periluminal epithelium (P, Q, arrowheads) and marginal zone of the anterior pituitary (R, arrowhead). Within the hypothalamus, *Gli1* transcripts are initially detected in the AH (M, arrow), but become restricted to the PH from 10.5 dpc (N-P, asterisks) and subventricular zone of the 3rd ventricle at 18.5 dpc (asterisk in R). (S-X) *Ptch1* transcripts are observed in the AH (arrows), PH (asterisks) and around the 3rd ventricle (asterisk in X). Within RP, *Ptch1* is initially expressed in the rostral region of the evaginating RP at 9.5 dpc (arrowhead in the inset in S), at the boundary of RP with the oral ectoderm and pharyngeal endoderm (arrowheads in T), and in the ventral region of the pinched-off pouch (arrowhead in U). Subsequently, *Ptch1* transcripts are localised within the periluminal epithelium and marginal zone (arrowheads in V-X). AP, anterior pituitary; PP, posterior pituitary; MB, midbrain; HB, hindbrain; IF, infundibulum; OE, oral ectoderm; PE, pharyngeal endoderm; VT, ventral telencephalon. Scale bar: 100 μm.

11.5 dpc) (Fig. S1G",H-H"). RNAScope *in situ* hybridisation, which enables sensitive detection of mRNA expression up to single-molecule resolution, confirmed the absence of *Shh* expression in the oral ectoderm at 16 somites (Fig. S1A-A") (Wang et al., 2012).

Supporting the RNA expression pattern, SHH was strongly detected in the anterior hypothalamus and pharyngeal endoderm, and a weak but consistent signal was also observed in the oral ectoderm and anterior part of RP epithelium, suggesting potential spreading of SHH from the pre-optic area towards the developing RP (Fig. 1G,H). From 11.5 to 14.5 dpc, *Shh* transcripts were detected within the developing hypothalamus (Fig. 1C-E,I-K) and by 18.5 dpc, signal was restricted to the ventricular zone of the 3rd ventricle (Fig. 1F). No obvious expression was detected in the developing pituitary by digoxigenin-labelled *Shh* riboprobes from 9.5-18.5 dpc (Fig. 1F). In contrast, SHH protein was clearly observed in single cells within the anterior pituitary at 18.5 dpc (Fig. 1L). In agreement with this, *Shh* transcripts were detected in sporadic single cells within the anterior pituitary at 18.5 dpc by RNAScope *in situ* hybridisation (Fig. S2A,B).

To assess the activation of the SHH pathway, the expression of the target genes *Gli1* and *Ptch1* was analysed by *in situ* hybridisation. At 9.5 dpc, *Gli1* transcripts were detected broadly throughout the developing hypothalamus and RP (Fig. 1M), and at 10.5 and 12.5 dpc, RP epithelium expressed *Gli1* robustly (Fig. 1N-P). By 14.5 dpc, *Gli1* transcripts were found mostly in the dorsal region of the periluminal epithelium of RP; by 18.5 dpc, expression was restricted to the marginal zone, a region of the anterior pituitary ventrally lining the cleft that is highly enriched for Sox2<sup>+</sup> stem cells (Fig. 1Q,R). However, in the hypothalamus, *Gli1* expression could not be detected in the ventral midline of the anterior hypothalamus or developing infundibulum from 10.5 dpc onwards, but signal was strong in the posterior hypothalamus, possibly including the prospective caudal tuberal and mammillary area (Fig. 1N). At 18.5 dpc, *Gli1* expression was restricted to the ventricular zone of the 3rd ventricle (Fig. 1R).

*Ptch1* expression was also very dynamic. A 9.5 dpc, *Ptch1* transcripts were weakly detected in the posterior (forming mammillary region), strongly detected in the anterior hypothalamus and barely detected in the tuberal hypothalamus – patterns that became even more pronounced by 10.5 dpc (Fig. 1S,T). Strong *Ptch1* signal was detected in the hypothalamus from 11.5 to 14.5 dpc, except for the infundibulum; by 18.5 dpc, the hypothalamic signal was mostly detected in the ventricular zone of the 3rd ventricle (Fig. 1U-X). Within the developing RP, *Ptch1* expression was detected broadly in the epithelial progenitors at 9.5 dpc, but became progressively restricted to the ventral areas of RP, adjacent to the oral

epithelium and pharyngeal endoderm by 11.5 dpc (Fig. 1S-U). At 12.5 dpc, only a small region of the periluminal epithelium of RP was positive for *Ptch1* transcripts (Fig. 1V). Subsequently, at 14.5 dpc and clearly at 18.5 dpc, *Ptch1* transcripts were observed only in the marginal zone (Fig. 1W,X).

At Carnegie stage 15 (CS15) in human fetal embryos, *SHH* transcripts and protein were identified in the anterior hypothalamus and pharyngeal endoderm, but were absent from the developing RP, similar to the mouse (Fig. S3A-D). *GLII* transcripts were observed throughout the developing hypothalamus (Fig. S3E,F) and RP, suggesting activation of the pathway.

Together, these expression studies suggest that the SHH pathway is activated preferentially in regions containing undifferentiated precursors/stem cells, such as the RP periluminal epithelium at early stages of development and the marginal zone lining the cleft at 18.5 dpc. In addition, these analyses demonstrate the expression of SHH protein in tissues adjacent to the developing RP at early developmental stages, including the developing hypothalamus and pharyngeal endoderm, suggesting that signalling from these domains may be required to activate the pathway in RP progenitors.

### Deletion of *Shh* in the *Hesx1* cell lineage leads to pituitary aplasia in *Hesx1*<sup>Cre/+</sup>;*Shh*<sup>fl/fl</sup> mutants

The *Hesx1-Cre* mouse line drives Cre-mediated recombination in the anterior neural plate, including the prospective telencephalon and prospective anterior hypothalamus, as well as RP epithelium from 9.0 dpc (Jayakody et al., 2012). We generated *Hesx1*<sup>Cre/+</sup>;*Shh*<sup>fl/fl</sup> mice to study the consequences of early *Shh* deletion in the anterior hypothalamic area, as *Shh* is not expressed in RP epithelium and expression in the oral ectoderm occurs from 10.0 dpc.

Genotypic analysis of embryos between 9.5 and 18.5 dpc revealed no statistical deviation from the expected Mendelian ratios (Table 1, *n*=361, Chi test *P*=0.9). In contrast, genotyping of pups of up to 3 weeks of age, revealed a significant deviation from the expected ratios (Table 1, *n*=67, Chi test *P*<0.001). No *Hesx1*<sup>Cre/+</sup>;*Shh*<sup>fl/fl</sup> mice were identified postnatally, suggesting perinatal lethality.

*Hesx1*<sup>Cre/+</sup>;*Shh*<sup>fl/fl</sup> mutant embryos showed mild forebrain defects from 10.5 dpc, including a reduction in the size of the telencephalic vesicles and, by 11.5 dpc, loss of pigmented retina (Fig. S4A-C). A very small proportion of the mutant embryos showed more-severe defects, including holoprosencephaly at 10.5 dpc (*n*=4 out of 28, Fig. S4D-F). At 18.5 dpc, severe craniofacial defects, as well as telencephalic and hypothalamic abnormalities, were observed in all mutants analysed (*n*=3, Fig. S5A-H). Pituitary tissue could not be identified morphologically at this stage in serial section analysis of the mutants (Fig. S5I-L).

**Table 1. Genotypes obtained from *Hesx1*<sup>Cre/+</sup>;*Shh*<sup>+/-</sup>×*Shh*<sup>fl/fl</sup> intercrosses**

| Stage (dpc)           | Genotypes (% expected)*                                        |                                                                 |                                                                  |                                                                   | Total |
|-----------------------|----------------------------------------------------------------|-----------------------------------------------------------------|------------------------------------------------------------------|-------------------------------------------------------------------|-------|
|                       | <i>Hesx1</i> <sup>+/+</sup> ; <i>Shh</i> <sup>fl/+</sup> (25%) | <i>Hesx1</i> <sup>+/+</sup> ; <i>Shh</i> <sup>fl/fl</sup> (25%) | <i>Hesx1</i> <sup>Cre/+</sup> ; <i>Shh</i> <sup>fl/+</sup> (25%) | <i>Hesx1</i> <sup>Cre/+</sup> ; <i>Shh</i> <sup>fl/fl</sup> (25%) |       |
| 9.5                   | 10                                                             | 12                                                              | 14                                                               | 12                                                                | 48    |
| 10.5                  | 27                                                             | 23                                                              | 26                                                               | 28                                                                | 104   |
| 11.5                  | 9                                                              | 8                                                               | 9                                                                | 7                                                                 | 33    |
| 12.5                  | 11                                                             | 14                                                              | 12                                                               | 10                                                                | 47    |
| 14.5                  | 8                                                              | 10                                                              | 15                                                               | 14                                                                | 47    |
| 16.5                  | 14                                                             | 12                                                              | 12                                                               | 13                                                                | 51    |
| 18.5                  | 8                                                              | 9                                                               | 11                                                               | 3                                                                 | 31    |
| Embryos (% observed)† | 87 (24.1%)                                                     | 88 (24.3%)                                                      | 99 (27.4%)                                                       | 87 (24.1%)                                                        | 361   |
| Pups (% observed)     | 19 (28.4%)                                                     | 24 (35.8%)                                                      | 26 (38.8%)                                                       | 0§                                                                | 67    |

\*Derived from expected Mendelian ratios.

†Chi-square test revealed no significant deviation from the expected Mendelian ratios.

§Chi-square test revealed a significant deviation from the expected 25% ratio (*P*<0.001).

Immunostaining against GH and PIT1, which label most of the pituitary cells at 18.5 dpc, revealed the complete lack of expression in serial sections in *Hesx1<sup>Cre/+</sup>;Shh<sup>fl/-</sup>* mutants at 18.5 dpc (Fig. S6). To further characterise the observed pituitary aplasia, we analysed embryos from 9.5 dpc onwards by Haematoxylin-Eosin staining. At 9.5 dpc, control embryos showed a close association between the evaginating RP epithelium and the floor of the neuroepithelium of the prospective infundibular area (Fig. 2A). In contrast, this intimate association was often lost in *Hesx1<sup>Cre/+</sup>;Shh<sup>fl/-</sup>* mutant embryos and mesenchymal tissue was observed intercalated between RP and the neural epithelium, and appeared to be overgrown (Fig. 2B). Reduced size and failure to contact the infundibular area was more obvious at 10.5 dpc; by 11.5 dpc, RP was severely hypoplastic and no infundibulum could be observed (Fig. 2C–F). At 12.5 dpc, *Hesx1<sup>Cre/+</sup>;Shh<sup>fl/-</sup>* mutant embryos displayed a fully penetrant phenotype in which RP was completely lost and no pituitary tissue could be identified from 12.5–18.5 dpc, either by Haematoxylin-Eosin

staining or immunostaining (Fig. 2G,H, Fig. S5). RNA *in situ* hybridisation on serial histological sections of *Hesx1<sup>Cre/+</sup>;Shh<sup>fl/-</sup>* mutants at 18.5 dpc revealed the loss or severe reduction in expression of most of the hypothalamic factors controlling pituitary function, including *Ghrh* (growth hormone-releasing hormone), *Sst* (somatostatin), *Oxt* (oxytocin), *Avp* (arginine vasopressin) and *Gnrh1* (gonadotropin-releasing hormone 1) as well as *Pomc1* (proopiomelanocortin- $\alpha$ ), suggesting loss of neuronal differentiation (Fig. 3).

The genetic deletion of *Shh* in the *Hesx1* cell lineage was assessed by RNA *in situ* hybridisation and immunofluorescence on histological sections of *Hesx1<sup>Cre/+</sup>;Shh<sup>fl/-</sup>* and control littermates at 9.5 to 10.5 dpc. Although, in the control embryos, *Shh* transcripts were observed in the anterior and posterior developing hypothalamus, no *Shh* expression was detectable in the anterior hypothalamus in *Hesx1<sup>Cre/+</sup>;Shh<sup>fl/-</sup>* mutants, despite the strong signal in the posterior hypothalamic area (Fig. 4A–F). At 10.5 dpc, *Shh* expression was not detected within the developing RP in control embryos; however, a weak but consistent signal was detected in the posterior region of the evaginating RP in *Hesx1<sup>Cre/+</sup>;Shh<sup>fl/-</sup>* mutants that can be interpreted as a rostral extension of the pharyngeal endoderm *Shh* expression domain into the developing RP (Fig. 4E,F). Loss of SHH in the anterior hypothalamus and ectopic SHH expression in the posterior RP were also confirmed at the protein level by specific immunofluorescence staining (Fig. 4G,H). In agreement with the deletion of *Shh*, expression of *Ptch1* was lost in the anterior, yet present in the posterior, hypothalamus in *Hesx1<sup>Cre/+</sup>;Shh<sup>fl/-</sup>* mutants (Fig. 4K,L). Loss of *Ptch1* and *Gli1* expression was also observed in the anterior region of the developing RP, with transcripts detectable only in the posterior RP (Fig. 4I–L). Expression of *Shh* was observed in the oral ectoderm of the *Hesx1<sup>Cre/+</sup>;Shh<sup>fl/-</sup>* mutants at 11.5 dpc, invading the epithelium of a rudimentary RP (Fig. 4M,N). These results demonstrate that, in addition to severe hypothalamic, telencephalic and craniofacial defects at late gestation, the early loss of *Shh* expression in the anterior hypothalamus results in abnormal development of RP from 9.5 dpc, with pituitary aplasia from 12.5 dpc.

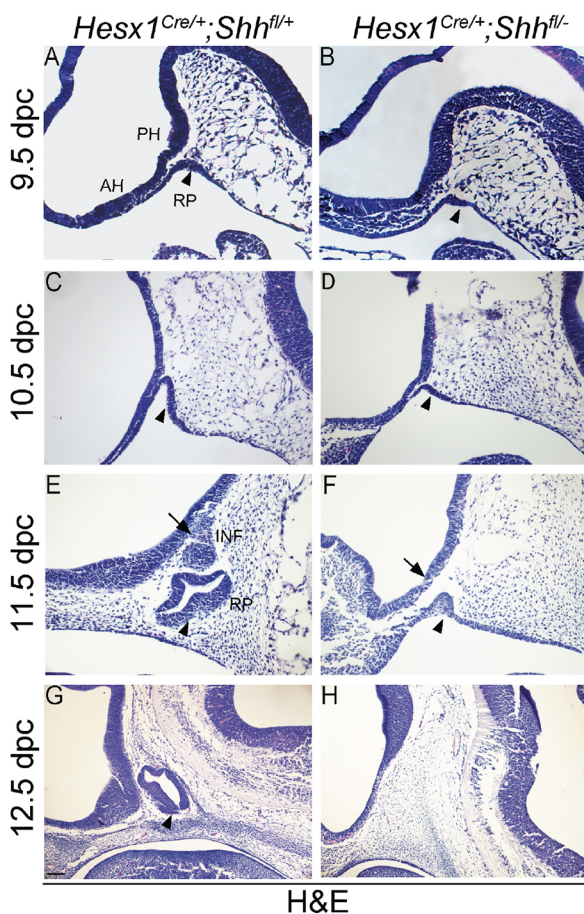

**Fig. 2. Developmental arrest and loss of pituitary tissue in *Hesx1<sup>Cre/+</sup>;Shh<sup>fl/-</sup>* mutants by 12.5 dpc.** Haematoxylin and Eosin staining on mid-sagittal sections of *Hesx1<sup>Cre/+</sup>;Shh<sup>fl/-</sup>* mutants and control embryos. (A,B) The evaginating RP (arrowheads) is observable in both genotypes at 9.5 dpc, but it looks smaller and is not intimately associated with the overlying neural ectoderm in the mutant compared with the control embryo. (C,D) RP is clearly hypoplastic in the *Hesx1<sup>Cre/+</sup>;Shh<sup>fl/-</sup>* mutant relative to the control embryo at 10.5 dpc (arrowheads). (E,F) The mutant RP is severely hypoplastic, has not detached from the oral ectoderm and does not make contact with the overlying hypothalamus compared with the control RP (arrowheads). Note the lack of infundibulum (INF, arrows) in the mutant embryo. (G,H) Note the complete loss of pituitary tissue in the mutant relative to the control embryo (arrowhead). RP, Rathke's pouch; PH, posterior hypothalamus; AH, anterior hypothalamus; INF, infundibulum. Scale bar: 100  $\mu$ m.

#### Anterior hypothalamus marker expression is lost in *Hesx1<sup>Cre/+</sup>;Shh<sup>fl/-</sup>* mutants

*Fgf8* and *Bmp4* are essential signals controlling hypothalamus and RP development (Davis and Camper, 2007; Ericson et al., 1998). Transcripts for these secreted factors were normally expressed in the posterior hypothalamus at 10.5 dpc, which includes the tuberal hypothalamus and primordium of the infundibulum, but their expression domains do not reach the anterior hypothalamic area, where *Shh* is expressed (Fig. 5A,C). In contrast, the expression domains of these crucial hypothalamic signals were extended anteriorly in the *Hesx1<sup>Cre/+</sup>;Shh<sup>fl/-</sup>* mutants, invading the domain where *Shh* was detected in the control embryos (Fig. 5B,D). The expression domains of *Tbx2* and *Tbx3*, two negative regulators of *Shh* expression (Trowe et al., 2013), were similar between *Hesx1<sup>Cre/+</sup>;Shh<sup>fl/-</sup>* mutants and controls, although *Tbx3* expression domain appeared slightly expanded (Fig. 5E–H). *Nkx2.1*, another crucial regulator of hypothalamic development (Kimura et al., 1996; Takuma et al., 1998), was broadly expressed throughout the hypothalamus in control embryos, but its expression domain was shortened in *Hesx1<sup>Cre/+</sup>;Shh<sup>fl/-</sup>* mutants with a lack of expression in the anterior hypothalamus (Fig. 5I,J). *Otx2* is an important transcription factor that is required for normal development of the hypothalamus and pituitary (Acampora et al., 1995; Mortensen et al., 2015; Tajima et al., 2009). Immunostaining revealed OTX2 expression in the posterior hypothalamus, with a sharp boundary at

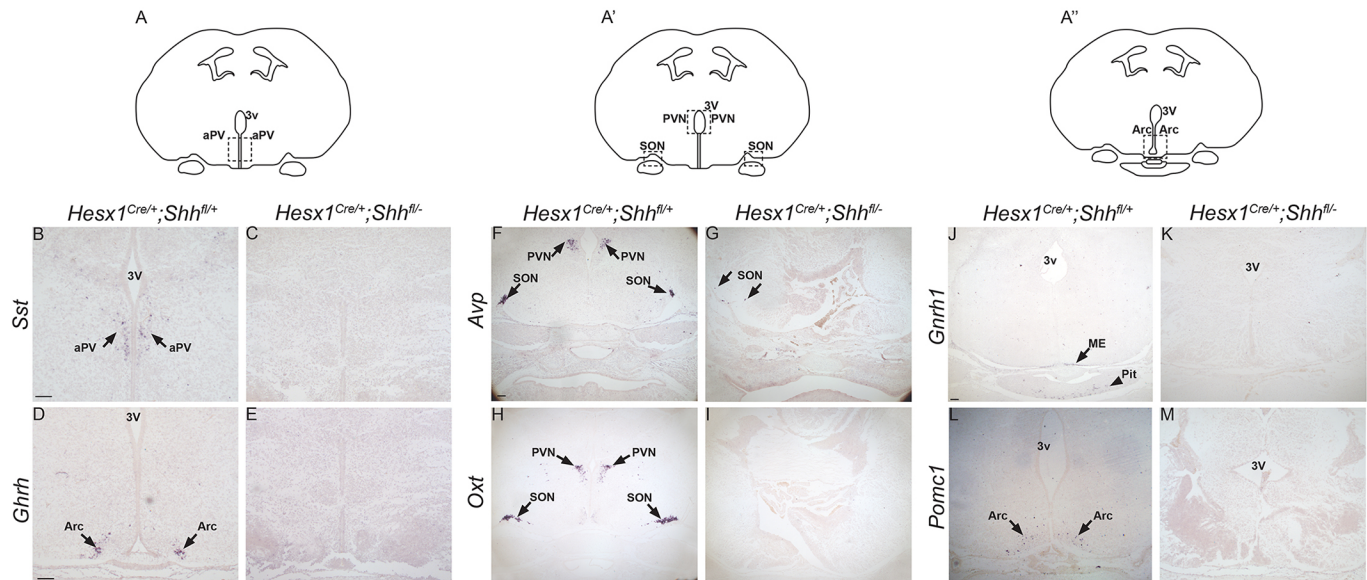

**Fig. 3. Loss of expression of hypothalamic factors in *Hesx1<sup>Cre/+</sup>;Shh<sup>fl/fl</sup>* mutants at 18.5 dpc.** *In situ* hybridisation against the hypothalamic factors somatostatin (*Sst*), growth hormone-releasing hormone (*Ghrh*), gonadotrophin-releasing hormone 1 (*Gnrh1*), proopiomelanocortin (*Pomc*), arginine-vasopressin (*Avp*) and oxytocin (*Oxt*) on frontal sections of *Hesx1<sup>Cre/+</sup>;Shh<sup>fl/fl</sup>* and control embryos at 18.5 dpc. (A,A') Schematic representations of the planes of section, indicating the positions of the anterior periventricular (aPV) and arcuate (Arc) nuclei. (B-E,J-M) Note the loss of expression of *Sst*, *Ghrh*, *Gnrh1* and *Pomc* in the mutants. (A') Schematic representation of the plane of section showing the approximate location of the supraoptic (SON) and paraventricular (PVN) nuclei. (F-I) Note the severe reduction in *Avp* and absence of *Oxt* expression in the mutants compared with the control embryos. 3V, third ventricle; ME, median eminence; Pit, pituitary. Scale bar: 100 µm.

the level where the infundibulum will develop, and in the developing ventral telencephalon, with a negative region encompassing the anterior hypothalamus (Fig. 5Q). In contrast, in the *Hesx1<sup>Cre/+</sup>;Shh<sup>fl/fl</sup>* mutants OTX2 domain was broadly observed throughout the hypothalamus with no detectable negative area in the neuroepithelium, suggesting that the anterior hypothalamus was missing (Fig. 5R). Expression analysis with other regional markers, including *Tcf4*, *Isl1* and *Wnt5a* as well as *Pomc*, a marker of arcuate neurons, further demonstrated the loss of the anterior hypothalamus in *Hesx1<sup>Cre/+</sup>;Shh<sup>fl/fl</sup>* mutants (Fig. 5K-P,S-X). Loss of ACTH and TPIT neural expression was observed in the anterior hypothalamus of the mutants at 12.5 dpc (Fig. S7). Together, these analyses indicate a loss of expression of anterior hypothalamic markers concomitant with the rostral expansion of the expression domain of posterior hypothalamic markers in *Hesx1<sup>Cre/+</sup>;Shh<sup>fl/fl</sup>* mutants.

#### Loss of *Lhx3* and *Lhx4* expression in RP epithelium in *Hesx1<sup>Cre/+</sup>;Shh<sup>fl/fl</sup>* mutants

Embryos homozygous null for *Lhx3* and *Lhx4* show arrested RP development with absence of pituitary tissue by 15.5 dpc (Sheng et al., 1997), a phenotype very similar to that in *Hesx1<sup>Cre/+</sup>;Shh<sup>fl/fl</sup>* mutants. Indeed, neither *Lhx3* nor *Lhx4* expression was detected in RP in *Hesx1<sup>Cre/+</sup>;Shh<sup>fl/fl</sup>* mutants, either by *in situ* hybridisation or immunostaining from 9.0 dpc (16 somites) to 11.5 dpc (Fig. 6A-D, G,H,K,L,M-P). Despite the failure to activate *Lhx3* and *Lhx4* expression, other RP markers such as *Pitx1*, *Sox2*, *Pitx2*, *Pax6*, *Six3*, *Isl1* and *Wnt4* were found to be expressed in the developing RP in *Hesx1<sup>Cre/+</sup>;Shh<sup>fl/fl</sup>* mutants, with no apparent differences when compared with control embryos (Fig. 6E,F,I,J,Q-X, Fig. 4S,T,W,X).

The loss of pituitary tissue in *Lhx3<sup>-/-</sup>;Lhx4<sup>-/-</sup>* double mutants has been attributed to decreased proliferation and/or increased apoptosis of RP progenitors. Immunostaining against activated caspase 3, a marker of apoptotic cells (Wolf et al., 1999), revealed the presence of only a few scattered positive cells in RP at 11.5 dpc,

and none at 9.5 or 10.5 dpc (Fig. 7H-M). A small but significant decrease in the mitotic index, as assessed using the mitotic marker phospho-histone H3 (Hendzel et al., 1997), was observed in *Hesx1<sup>Cre/+</sup>;Shh<sup>fl/fl</sup>* mutants at 11.5 dpc (Fig. 7A-G). Of note, comparable values were observed between mutants and control embryos at 9.5 and 10.5 dpc, suggesting that decreased proliferation may not be the only mechanism accounting for the pituitary aplasia observed in the *Hesx1<sup>Cre/+</sup>;Shh<sup>fl/fl</sup>* mutants from 12.5 dpc.

Hypothalamic BMP4 and FGF8 signals are important for inducing LHX3<sup>+</sup>/LHX4<sup>+</sup> RP progenitor identity (Treier et al., 1998, 2001). As shown in Fig. 5A-D, the hypothalamic expression domains of these factors were anteriorised in *Hesx1<sup>Cre/+</sup>;Shh<sup>fl/fl</sup>* mutants at 10.5 dpc, a phenotype usually associated with increased recruitment of additional oral ectoderm into RP epithelium, which leads to RP enlargement or even the induction of multiple LHX3<sup>+</sup>/LHX4<sup>+</sup> pouches (Dasen et al., 2001; Davis and Camper, 2007; Gaston-Massuet et al., 2016; Zhao et al., 2012). Therefore, it was interesting that, even in the presence of more FGF and BMP signalling, RP development still arrested. Activation of the BMP and FGF pathways was demonstrated by the expression of p-SMAD1/5/8 and p-ERK1/2 in RP epithelium in *Hesx1<sup>Cre/+</sup>;Shh<sup>fl/fl</sup>* mutants and control embryos at 10.5 dpc, respectively (Fig. S8C,D, G,H). In addition, sprout 2 (*Spry2*), a target gene of the FGF pathway (Minowada et al., 1999; Tefft et al., 1999), was expressed in the mutant RP at this stage, suggesting pathway activation (Fig. S8A,B). Expression of *Fgfr2*, which mediates FGF8 and FGF10 signalling (Turner and Grose, 2010), was also detected in the mutant RP (Fig. S8A,B). These results suggest that both the FGF and BMP signalling pathways are activated in the *Hesx1<sup>Cre/+</sup>;Shh<sup>fl/fl</sup>* mutant RP, excluding the possibility that the lack of *Lhx3* and *Lhx4* expression is due to the inability of RP epithelium to respond to these signals. In addition, these analyses demonstrate that the FGF and BMP pathways are not sufficient to induce LHX3<sup>+</sup>/LHX4<sup>+</sup> RP identity in the absence of SHH signalling.

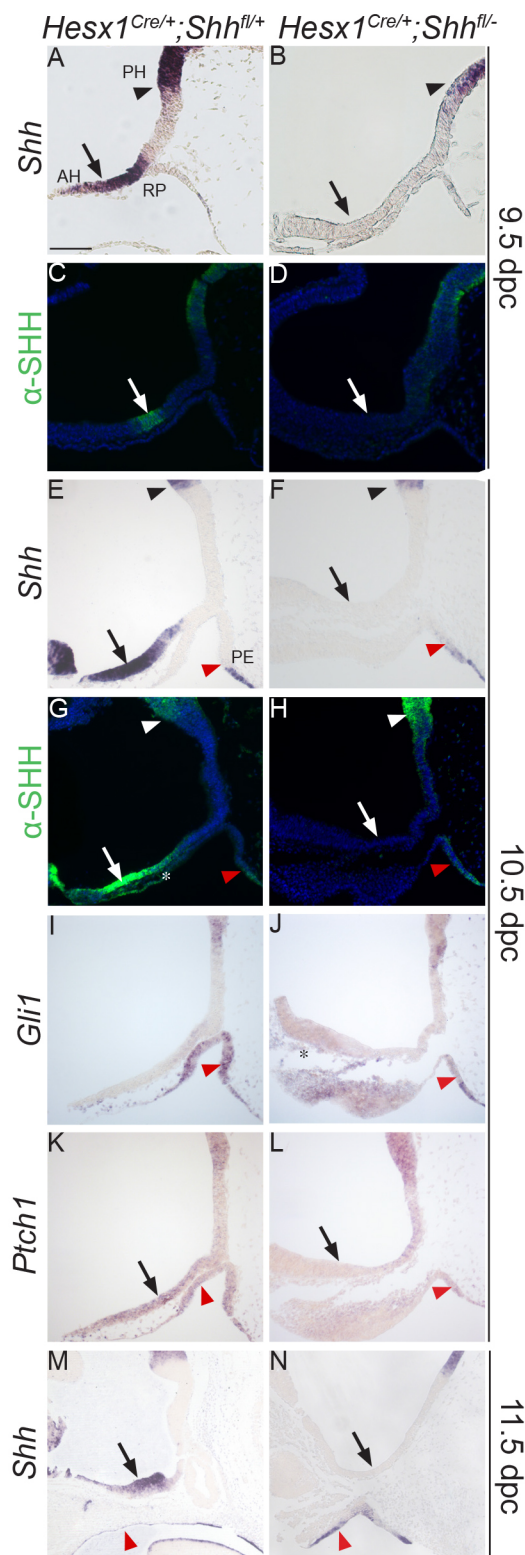

**Fig. 4. Loss of *Shh* expression in the anterior hypothalamus of *Hesx1<sup>Cre/+</sup>; Shh<sup>fl/-</sup>* mutants results in reduced *Gli1* and *Ptch1* expression in the developing Rathke's pouch.** (A-H) *In situ* hybridisation against *Shh* and anti-SHH immunofluorescent staining on mid-sagittal sections of control and *Hesx1<sup>Cre/+</sup>; Shh<sup>fl/-</sup>* mutant embryos at 9.5 and 10.5 dpc. Expression of *Shh* transcripts (A,B,E,F) or SHH protein (C,D,G,H) is detected in the anterior and posterior hypothalamus in the control embryos, but is completely undetectable in the AH in the mutant embryos (AH, arrows; PH, black arrowheads). *Shh*/SHH expression is not detected in the developing RP in the control embryos, but there is ectopic *Shh*/SHH signal in the posterior region of the developing RP adjacent to the pharyngeal endoderm (PE, red arrowheads) in the mutant RP (I,J). *Gli1* transcripts are strongly detected in the control RP (arrowhead in I), but barely detectable and mostly restricted to the posterior region in the mutant RP (arrowhead in J). Note the *Gli1* expression in head mesenchyme underlying the AH in the mutant (asterisk in J). (K,L) *Ptch1* expression is lost in the AH (arrows) and developing RP (arrowheads) in the mutant relative to the control embryo. (M,N) *Shh* transcripts are not detected in the anterior hypothalamus in the mutant embryo (arrows), but are detected throughout the oral ectoderm and pharyngeal endoderm in both the mutant and control embryos (arrowheads). RP, Rathke's pouch; PH, posterior hypothalamus; AH, anterior hypothalamus; PE, pharyngeal endoderm. Scale bar: 100  $\mu$ m.

in the oral epithelium but did not invade the anterior region of RP in control embryos at 10.5 dpc (Fig. 5C). However, ectopic *Bmp4* expression was consistently observed in the anterior region of RP in *Hesx1<sup>Cre/+</sup>; Shh<sup>fl/-</sup>* mutants, suggesting a caudal extension of the *Bmp4<sup>+</sup>* oral ectoderm into the developing pouch (Fig. 5D). Likewise, the expression of TCF4 (Fig. 5O) and SHH (Fig. 4E,G) was detected in the pharyngeal endoderm, but not in RP in control embryos at 10.5 dpc. In contrast, an anterior expansion of both TCF4 and SHH expression domains was observed in the *Hesx1<sup>Cre/+</sup>; Shh<sup>fl/-</sup>* mutants, with strong signal detectable in the posterior region of RP adjacent to the pharyngeal endoderm (Fig. 5P, Fig. 4F,H). Finally, these observations were further corroborated with other markers, such as N- and E-cadherin. In normal embryos at 10.5 dpc, E-cadherin is expressed in the oral ectoderm, pharyngeal endoderm but not in RP, which expresses N-cadherin (Fig. 5U). Anterior N-cadherin expression was lost in the *Hesx1<sup>Cre/+</sup>; Shh<sup>fl/-</sup>* mutant RP, which expressed E-cadherin (Fig. 5V). Similar ectopic expression was also revealed by immunostaining against ISL1, which was only identified in the ventral region of RP in control embryos, but throughout RP in *Hesx1<sup>Cre/+</sup>; Shh<sup>fl/-</sup>* mutants (Fig. 5S,T).

To further characterise the loss of RP progenitor identity, we performed gene expression analysis by RNA sequencing of manually dissected RP from *Hesx1<sup>Cre/+</sup>; Shh<sup>fl/-</sup>* mutant and control embryos at 10.5 dpc ( $n=2$  RP per genotype). This study revealed a total of 208 significant differentially expressed genes between genotypes (adjusted  $P$ -value  $<0.1$ ; Fig. S9A). Gene ontology analysis presented the term GO: 0029183 'Pituitary gland development' as a term significantly associated to these dysregulated genes ( $P<0.05$ , adjusted; Table S1). Heatmap representation of expression levels of 12 genes involved in normal pituitary development revealed a significant downregulation of *Lhx3*, *Lhx4*, *Hesx1*, *Prop1* and *Six3* expression in the mutant relative to the control RP (Fig. S9B; Table S2). Furthermore, gene set enrichment analysis revealed a negative enrichment of genes associated with an active SHH pathway in the mutant relative to control RP (normalised enrichment score, NES=-1.73, false discovery rate, FDR=0.008), demonstrating a downregulation of the pathway in the *Hesx1<sup>Cre/+</sup>; Shh<sup>fl/-</sup>* mutant RP, also supported by the heatmap representation of SHH pathway genes (Fig. S9C,D). *Shh* mRNA was found to be non-significantly downregulated in the *Hesx1<sup>Cre/+</sup>; Shh<sup>fl/-</sup>* mutant RP (2.57-fold change, adjusted  $P$ -value 0.236), possibly reflecting the Cre-mediated deletion of the *Shh* locus.

#### A change of fate of RP epithelium into oral ectoderm and pharyngeal endoderm contributes to the loss of pituitary tissue in *Hesx1<sup>Cre/+</sup>; Shh<sup>fl/-</sup>* mutants

We observed that markers normally expressed in either the oral ectoderm or pharyngeal endoderm, abutting the developing RP, were ectopically expressed and invaded the epithelium of the evaginating mutant RP. For example, *Bmp4* expression was detected

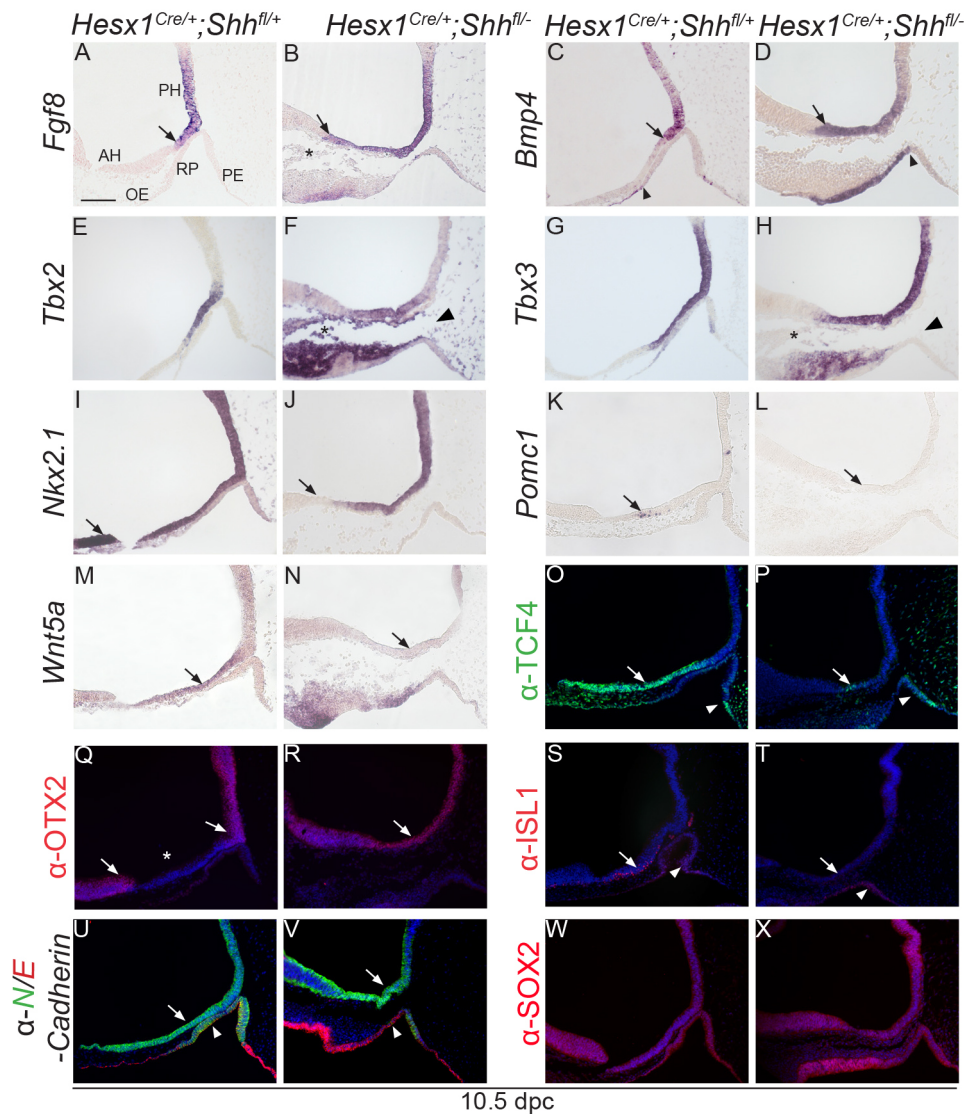

**Fig. 5. Anterior hypothalamic identity is lost in *Hesx1<sup>Cre/+</sup>;Shh<sup>fl/-</sup>* mutant embryos.** *In situ* hybridisation and immunofluorescence on mid-sagittal sections at 10.5 dpc of control and *Hesx1<sup>Cre/+</sup>;Shh<sup>fl/-</sup>* mutant embryos. (A–D) *Fgf8* and *Bmp4* expression domains are restricted to the posterior hypothalamus (PH) in the control embryos (arrows in A,C), but are remarkably anteriorised in the mutants (arrows in B,D). Note the ectopic expression of *Bmp4* in the anterior region of the mutant Rathke's pouch (RP) (arrowhead in D). Asterisk in B denotes the presence of excess head mesenchyme. (E–H) *Tbx2* and *Tbx3* transcripts are detected in the hypothalamus, in the region overlying RP (possibly the prospective infundibulum). Note the expression of these markers in the head mesenchyme underlying the hypothalamus (asterisks in F,H) and the separation between RP and the prospective infundibular area in the mutant embryo (arrowhead in F). (I,J) The expression domain of *Nkx2.1* is shorter in the mutant compared with the control embryo (arrows). (K,L) *Pomc1* transcripts are lost in the mutant AH compared with the control (arrows). (M,N) The *Wnt5a* expression domain is reduced in the mutant AH compared with the control (arrows). (O,P) TCF4 is expressed in the AH in the control embryo, but its expression is markedly reduced in the mutant (arrows). Note the TCF4 ectopic expression in the posterior region of RP (arrowheads). (Q,R) In the control embryo (Q), immunostaining against OTX2 shows expression in the posterior hypothalamus and ventral telencephalon (arrows), but no signal is observed in the AH (asterisk). In the mutant embryo (R), the OTX2-negative neuroepithelium is lost and the PH and VT domains are merged (arrow in R). (S,T) Immunolabelling revealing a lack of ISL1<sup>+</sup> cells in the mutant compared with the control AH (arrows). Note the presence of ISL1<sup>+</sup> cells in both the mutant and control RP (arrowheads). (U,V) Double immunofluorescence against N- and E-cadherin (green and red, respectively) showing comparable N-cadherin expression in the hypothalamus between both genotypes (arrows). Note that N-cadherin is not expressed in the anterior region of the mutant RP, which expresses E-cadherin instead, possibly suggesting a posterior expansion of its expression domain in the oral ectoderm (arrowheads). (W,X) SOX2 expression in the hypothalamus and RP epithelium is comparable between the control and mutant embryo. RP, Rathke's pouch; PH, posterior hypothalamus; AH, anterior hypothalamus; OE, oral endoderm; PE, pharyngeal endoderm. Scale bar: 100  $\mu$ m.

Together, these analyses strongly suggest that the loss of *Shh* expression in the anterior hypothalamus results in failure to activate the SHH pathway and to initiate *Lhx3/Lhx4* expression in the RP epithelium. This may result in a progressive cell fate transformation of RP epithelium, whereby the rostral part of RP acquires a non-RP oral ectoderm fate, while its posterior aspect turns into pharyngeal endoderm by 12.5 dpc.

#### Conditional overactivation of the SHH pathway leads to severe pituitary hyperplasia but normal differentiation of hormone-producing cells in *Hesx1<sup>Cre/+</sup>;Ptch1<sup>fl/fl</sup>* mutants

We sought to explore the consequences of overactivating the pathway during hypothalamic-pituitary axis development by genetically deleting *Ptch1* in the *Hesx1*-cell lineage in

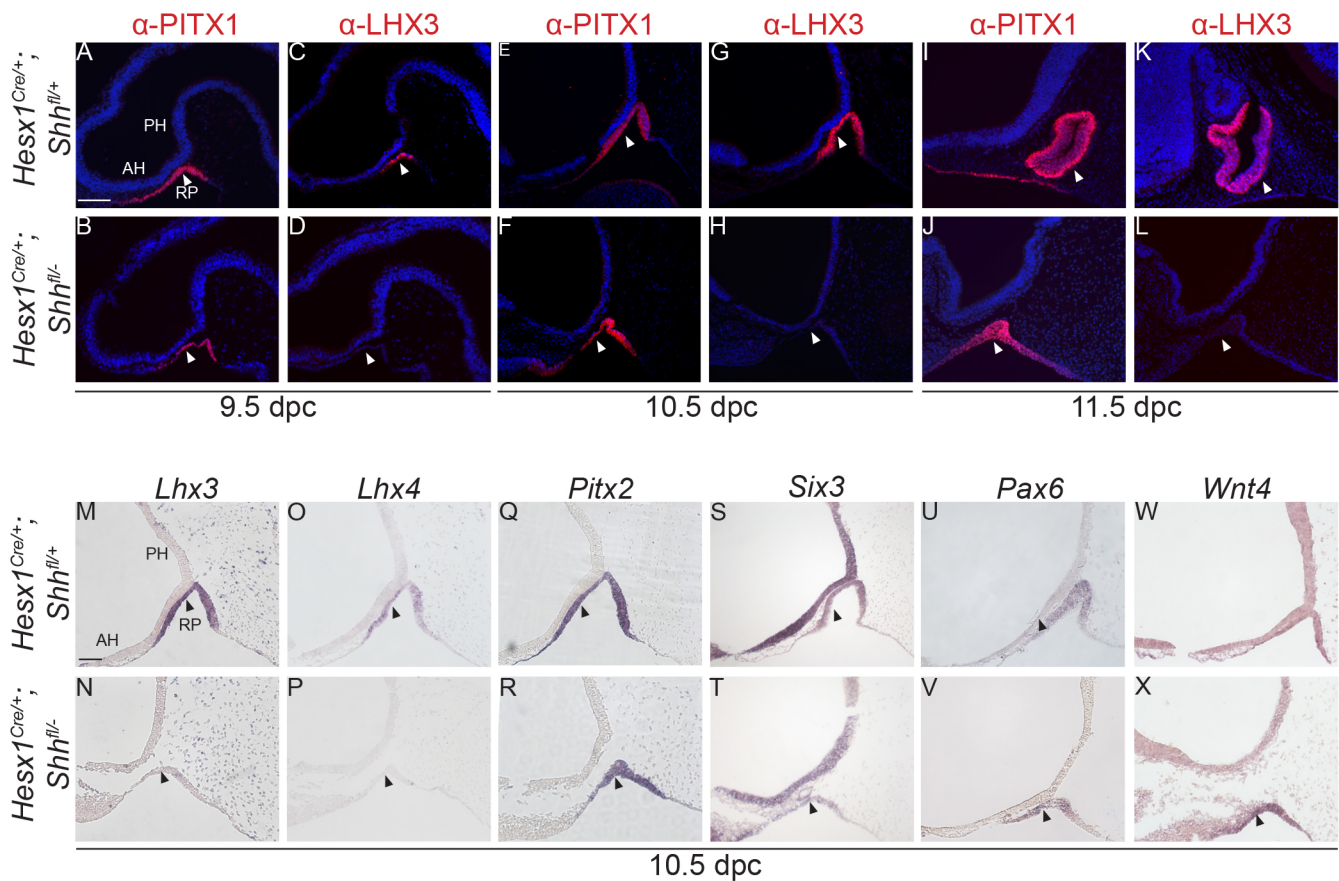

**Fig. 6. RP epithelium fails to activate LHX3 and LHX4 expression in *Hesx1<sup>Cre/+</sup>;Shh<sup>fl/fl</sup>* mutants.** Immunofluorescence and *in situ* hybridisation on mid-sagittal sections on *Hesx1<sup>Cre/+</sup>;Shh<sup>fl/fl</sup>* and control embryos against RP progenitor markers. Markers and stages are indicated. (A–L) Single immunofluorescence staining showing that while PITX1 expression is maintained, LHX3 is undetectable in the RP of the mutants compared with control embryos from 9.5 to 11.5 dpc (arrowheads). (M–P) *In situ* hybridisation confirms the lack of *Lhx3* and *Lhx4* expression in the mutant RP at 10.5 dpc (arrowheads). (Q–X) Transcripts for other RP markers such as *Pitx2*, *Six3*, *Pax6* and *Wnt4* are detected in the developing mutant and control RP (arrowheads). RP, Rathke's pouch; PH, posterior hypothalamus; AH, anterior hypothalamus. Scale bar: 100 µm.

*Hesx1<sup>Cre/+</sup>;Ptch1<sup>fl/fl</sup>* mice. *Hesx1<sup>Cre/+</sup>;Ptch1<sup>fl/fl</sup>* mice die perinatally (Table 2) with severe forebrain and craniofacial defects (Fig. S10). Haematoxylin and Eosin staining revealed no gross morphological defects in the developing RP or infundibulum between *Hesx1<sup>Cre/+</sup>;Ptch1<sup>fl/fl</sup>* mutants and control embryos at 10.5 dpc (Fig. 8A,B). The first clear evidence of a morphological defect was observed at 12.5 dpc (Fig. 8C,D), when the developing anterior lobe appeared hyperplastic in *Hesx1<sup>Cre/+</sup>;Ptch1<sup>fl/fl</sup>* mutants compared with controls. Pituitary hyperplasia was more evident at 14.5 and 18.5 dpc, with an enlargement of the cleft and thickening of the anterior lobe in mutants relative to controls (Fig. 8E–H). Upregulation of the SHH pathway in RP was observed from 10.5 dpc (Fig. 8I–P). Cell counting of dissociated pituitaries at 18.5 dpc showed a total of  $98,333 \pm 4\%$  cells in the pituitary of the *Hesx1<sup>Cre/+</sup>;Ptch1<sup>fl/fl</sup>* versus  $48,600 \pm 9.4\%$  ( $P < 0.01$ ) in the controls, confirming the hyperplasia.

Quantitative analysis of mitotic cells revealed a significant increase in the mitotic index in the periluminal progenitors lining RP at 12.5 and 14.5 dpc, and cells around the pituitary cleft at 18.5 dpc in the *Hesx1<sup>Cre/+</sup>;Ptch1<sup>fl/fl</sup>* mutants relative to the controls (Fig. S11). Patterning of the developing hypothalamus and specification of RP at 10.5 dpc occurred normally in *Hesx1<sup>Cre/+</sup>;Ptch1<sup>fl/fl</sup>* mutants compared with control embryos (Fig. S12). Likewise, cell commitment and differentiation of hormone-

producing cells was not prevented in the *Hesx1<sup>Cre/+</sup>;Ptch1<sup>fl/fl</sup>* mutants (Fig. S13 and S14).

#### Overactivation of the SHH pathway results in expansion of the Sox2<sup>+</sup> stem cell compartment in *Hesx1<sup>Cre/+</sup>;Ptch1<sup>fl/fl</sup>* mutants

At 14.5 dpc, the expression pattern of SOX2 was comparable between genotypes (Fig. 9A,B). In contrast, SOX9 expression in the developing AL appeared elevated in the *Hesx1<sup>Cre/+</sup>;Ptch1<sup>fl/fl</sup>* mutants compared with controls (Fig. 9E,F). At 18.5 dpc, numbers of SOX2<sup>+</sup> and SOX9<sup>+</sup> cells were significantly increased in the anterior pituitary and marginal zone of *Hesx1<sup>Cre/+</sup>;Ptch1<sup>fl/fl</sup>* embryos compared with controls (Fig. 9C,D,G–I). It has previously been shown that pituitary cells with clonogenic potential *in vitro* are contained within the SOX2<sup>+</sup> cell population (Andoniadou et al., 2012, 2013; Vankelecom, 2010). Culture of dissociated cells in stem-cell-promoting media revealed a significant increase in clonogenic potential of the *Hesx1<sup>Cre/+</sup>;Ptch1<sup>fl/fl</sup>* mutant pituitaries compared with controls at 18.5 dpc, evidenced by a sevenfold increase in numbers of clonogenic cells (Fig. 9J). Together, these studies demonstrate that the activation of the SHH pathway by *Ptch1* deletion in *Hesx1<sup>Cre/+</sup>;Ptch1<sup>fl/fl</sup>* mutants results in increased proliferation of LHX3<sup>+</sup>/LHX4<sup>+</sup> RP progenitors, which results in anterior pituitary hyperplasia and enlargement of the stem cell compartment at 18.5 dpc.



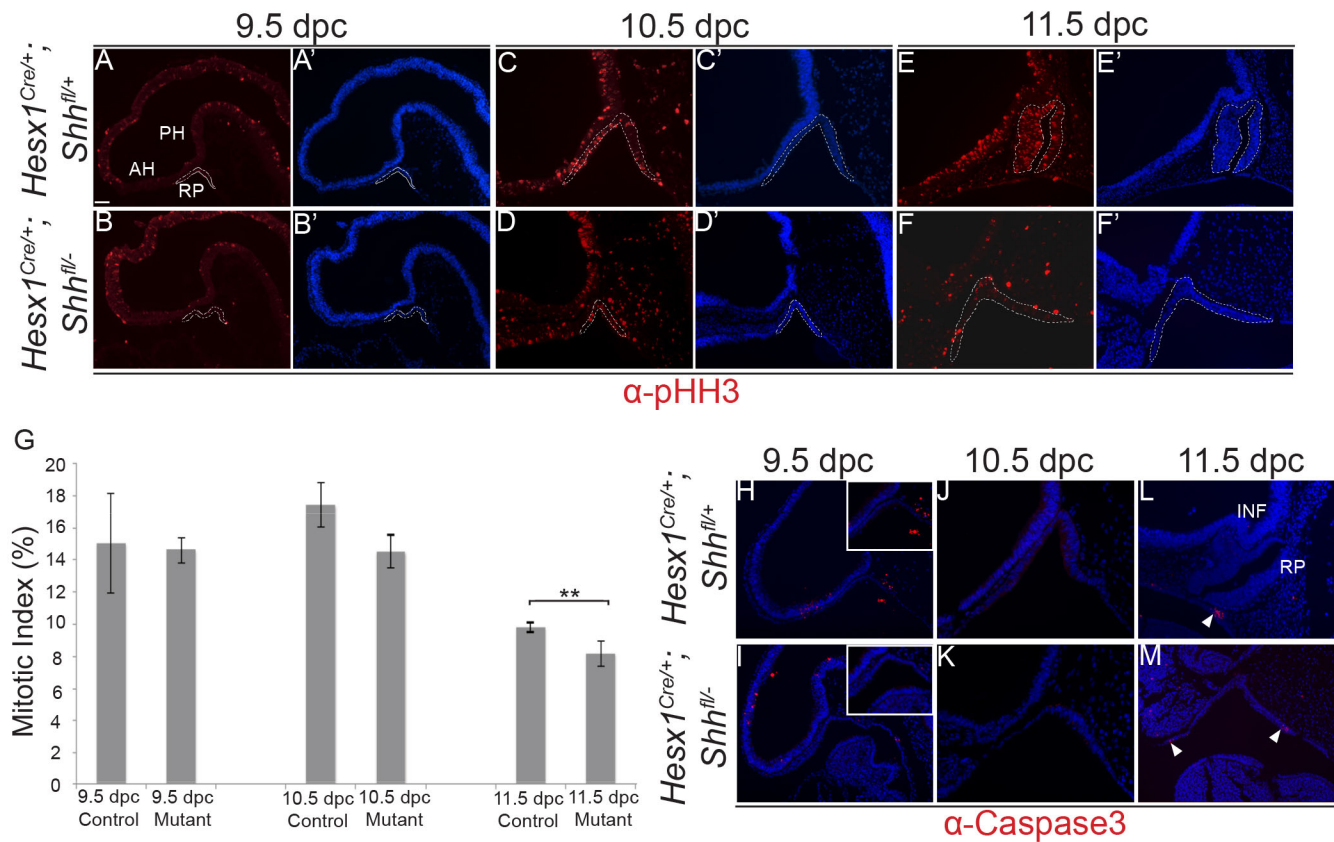

**Fig. 7. Reduced proliferation of RP epithelium in *Hesx1<sup>Cre/+</sup>;**Shh<sup>fl/fl</sup>* mutant embryos.** (A-G) Immunofluorescent staining against phospho-Histone H3 (pHH3) on mid-sagittal sections of control and *Hesx1<sup>Cre/+</sup>;**Shh<sup>fl/fl</sup>* embryos from 9.5 to 11.5 dpc. Note the significant decrease in the mitotic index in the RP epithelium in *Hesx1<sup>Cre/+</sup>;**Shh<sup>fl/fl</sup>* mutant compared with control embryos at 11.5 dpc. The mitotic index is the ratio of pHH3<sup>+</sup> cells out of the total DAPI<sup>+</sup> nuclei. Student's *t*-test: 9.5 dpc, *P*=0.92; 10.5 dpc, *P*=0.0645; 11.5 dpc, *P*<0.001 (*n*=6 embryos per group). (H-M) Immunofluorescence against activated cleaved caspase 3 revealing the absence of positive cells in RP epithelium in both genotypes from 9.5 and 10.5 dpc. Apoptotic cells are observed only in the 'feet' of the evaginating RP at 11.5 dpc (arrowheads). Mesenchymal cells around RP show reduced staining in the mutant embryo. Positive signal in the cavities is artefactual. Dashed lines in A-F' delineate the area that was quantified. RP, Rathke's pouch; PH, posterior hypothalamus; AH, anterior hypothalamus. Scale bar: 100 μm.

## DISCUSSION

The main finding in this paper is the demonstration that SHH signalling is essential for the specification of LHX3<sup>+</sup>;LHX4<sup>+</sup> RP progenitors *in vivo*. *In vitro*, both in explant cultures of prospective RP oral epithelium (Treier et al., 2001), as well as embryonic stem cell aggregates (Ozone et al., 2016; Suga et al., 2011), SHH signals or the activation of this pathway using smoothed agonists are required for the specification of LHX3<sup>+</sup> progenitors. However, genetic approaches have failed to unravel this function, perhaps because the inhibition of the SHH pathway in the developing

pituitary was not achieved early enough (Treier et al., 2001) or the deletion of the *Shh* expression in the anterior hypothalamus was incomplete (Zhao et al., 2012). Here, we show that the loss of SHH expression in the anterior hypothalamus in *Hesx1<sup>Cre/+</sup>;**Shh<sup>fl/fl</sup>* embryos leads to downregulation of the pathway and failure to activate the expression of LHX3 and LHX4 in the rudimentary RP epithelium at 9.0 dpc (i.e. 16-somite stage). As a consequence, there is a severe developmental arrest, no formation of a definitive pouch and loss of pituitary tissue by 12.5 dpc, a phenotype resembling that of the *Lhx3<sup>-/-</sup>;**Lhx4<sup>-/-</sup>* double homozygous mutants (Sheng et al.,

**Table 2. Genotypes obtained from *Hesx1<sup>Cre/+</sup>;**Ptch1<sup>fl/+</sup> × Ptch1<sup>fl/fl</sup>* intercrosses**

| Stage                 | Genotypes (% expected)*                                       |                                                                |                                                                 |                                                                  | Total |
|-----------------------|---------------------------------------------------------------|----------------------------------------------------------------|-----------------------------------------------------------------|------------------------------------------------------------------|-------|
|                       | <i>Hesx1<sup>+/+</sup>;</i> <i>Ptch1<sup>fl/+</sup></i> (25%) | <i>Hesx1<sup>+/+</sup>;</i> <i>Ptch1<sup>fl/fl</sup></i> (25%) | <i>Hesx1<sup>Cre/+</sup>;</i> <i>Ptch1<sup>fl/+</sup></i> (25%) | <i>Hesx1<sup>Cre/+</sup>;</i> <i>Ptch1<sup>fl/fl</sup></i> (25%) |       |
| 10.5 dpc              | 7                                                             | 8                                                              | 7                                                               | 9                                                                | 31    |
| 11.5 dpc              | 5                                                             | 7                                                              | 6                                                               | 6                                                                | 24    |
| 12.5 dpc              | 9                                                             | 6                                                              | 8                                                               | 10                                                               | 36    |
| 14.5 dpc              | 9                                                             | 8                                                              | 7                                                               | 7                                                                | 28    |
| 16.5 dpc              | 7                                                             | 4                                                              | 9                                                               | 8                                                                | 28    |
| 18.5 dpc              | 12                                                            | 14                                                             | 16                                                              | 15                                                               | 57    |
| Embryos (% observed)† | 49 (24%)                                                      | 47 (23%)                                                       | 53 (26%)                                                        | 55 (27%)                                                         | 204   |
| Pups (% observed)     | 26 (39%)                                                      | 21 (32%)                                                       | 19 (29%)                                                        | 0§                                                               | 66    |

\*Derived from expected Mendelian ratios.

†Chi-square test revealed no significant deviation from the expected Mendelian ratios.

§Chi-square test revealed a significant deviation from the expected 25% ratios (*P*<0.001).

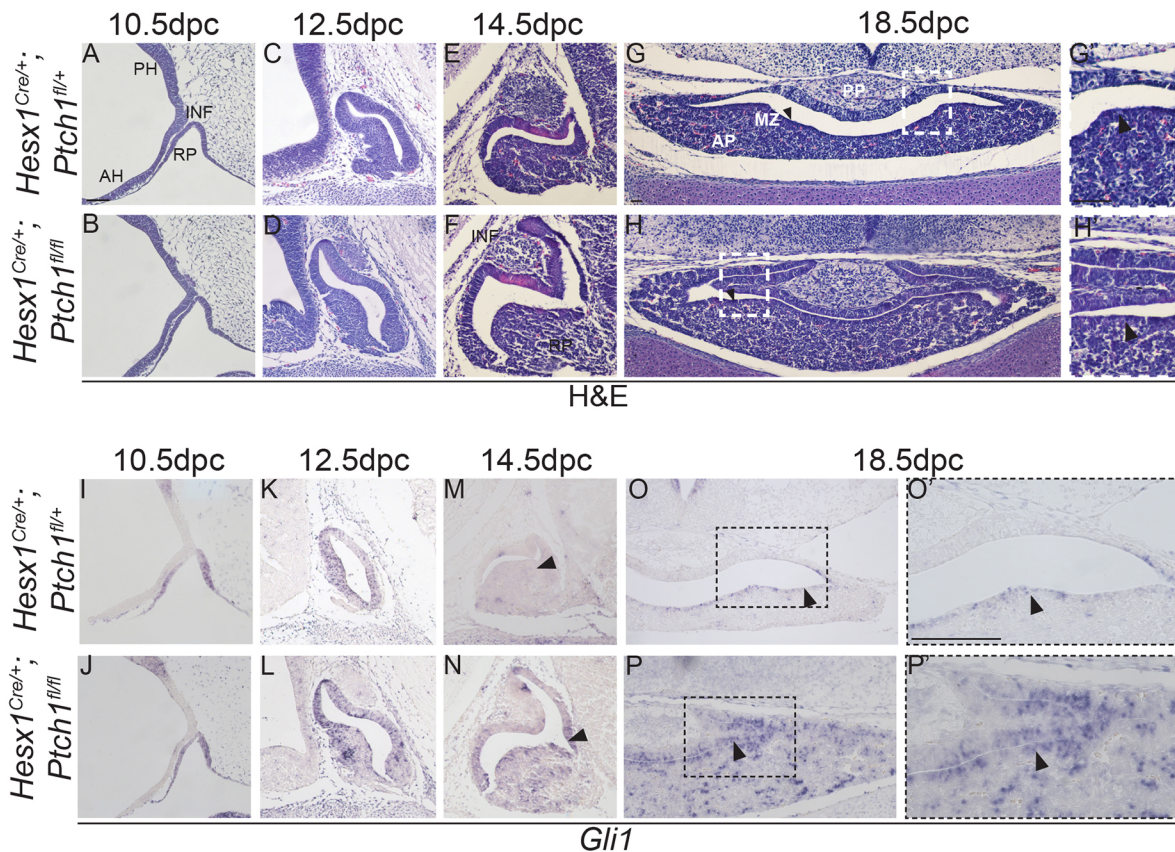

**Fig. 8. Conditional deletion of *Ptch1* in *Hesx1<sup>Cre/+</sup>;Ptch1<sup>fl/fl</sup>* mutants results in pituitary hyperplasia.** (A-H) Haematoxylin and Eosin staining on mid-sagittal (A-F) and coronal (G,H) sections of control and *Hesx1<sup>Cre/+</sup>;Ptch1<sup>fl/fl</sup>* embryos throughout pituitary organogenesis. At 10.5 dpc (A,B), the morphology of the RP is comparable between genotypes, but looks slightly expanded in the mutant compared with the control embryo at 12.5 dpc (C,D). By 14.5 dpc (E,F), the *Hesx1<sup>Cre/+</sup>;Ptch1<sup>fl/fl</sup>* anterior pituitary (AP) is clearly hyperplastic relative to the control, but the infundibulum (INF) looks normal. AP hyperplasia is also evident at 18.5 dpc (G,H), with dorsal extensions of the cleft. The posterior pituitary (PP) looks comparable between genotypes. Note the expansion of the marginal zone (MZ; arrowheads in G,H), which is thicker in the mutant compared with the control pituitary. G' and H' are higher magnifications of the boxed areas in G and H (arrowheads indicate the marginal zone). (I-P) *In situ* hybridisation for *Gli1*. A remarkable increase in *Gli1* expression is observed throughout the AP in the mutants relative to the control embryos, including the MZ (arrowheads in O and P). O' and P' are higher magnifications of the boxed areas in O and P. RP, Rathke's pouch; PH, posterior hypothalamus; AH, anterior hypothalamus; AP, anterior pituitary; INF, infundibulum. Scale bar: 100  $\mu$ m.

1996, 1997). These morphological and molecular defects observed in *Hesx1<sup>Cre/+</sup>;Shh<sup>fl/fl</sup>* mutants are also present in mouse mutants with disrupted BMP and FGF signalling, either due to loss/reduction of *Bmp* and *Fgf* gene expression in the hypothalamus or to defective competence of RP to respond to hypothalamic BMP and FGF signals (De Moerloose et al., 2000; Kimura et al., 1996; Ohuchi et al., 2000; Takuma et al., 1998). Although required, SHH is not necessarily sufficient to induce RP specification, as the expansion of hypothalamic *Shh* expression in *Nkx2.1<sup>-/-</sup>* mutants does not induce *Lhx3* or *Lhx4* expression in the evaginating RP in the absence of normal BMP and FGF signalling (Fig. 10). Of note, *Nkx2.1* is primarily required within the hypothalamus for normal RP development (Takuma et al., 1998). Therefore, BMP, FGF and SHH are all required to induce RP progenitor fate at 9.5 dpc and cannot replace each other.

Our results demonstrate that the anterior hypothalamic expression of *Shh* is essential for normal patterning of the hypothalamus and that, potentially, these hypothalamic defects (i.e. upregulation of *Tbx2* and *Tbx3*, and reduction of *Wnt5a* and *Tcf4* expression) could contribute to the RP phenotype. *Shh* is expressed in the anterior endoderm (prechordal plate) at neural plate stages where it plays a role in patterning the ventral midline and in the separation of the eye fields, as well as the telencephalic vesicles (Xavier et al., 2016). In

*Hesx1<sup>Cre/+</sup>;Shh<sup>fl/fl</sup>* mutants, holoprosencephaly is infrequent and cyclopia is not observed, suggesting that signalling from the anterior endoderm is not compromised in the vast majority of the embryos. Although speculative, the excess of mesenchyme observed between the oral ectoderm and the anterior hypothalamus may interfere with signalling between the neural and oral ectoderm, or have stimulatory or inhibitory effects that could also contribute to the phenotype. The reasons underlying the excess of mesenchyme are not known, but this defect may be related to the mispatterning of the anterior hypothalamus (loss of *Shh* and ectopic *Fgf8*, *Fgf10* and *Bmp4* expression). Although we cannot rule out the contribution of other dysregulated signals, the fact that *Gli1* and *Ptch1* expression in the developing RP is downregulated in *Hesx1<sup>Cre/+</sup>;Shh<sup>fl/fl</sup>* mutants supports a direct role for the SHH pathway in RP specification.

The accompanying paper (Fu et al., 2017) provides further insights into the potential mechanism underlying the loss of anterior hypothalamic tissue in the absence of SHH signals. Inhibition of the SHH pathway using cyclopamine in chick embryos at HH10-13 (10-15 somites) results in the failure to form the anterior hypothalamus (*Six3<sup>+</sup>;Fgf10<sup>-</sup>* neuroepithelium), and instead *Six3<sup>+</sup>;Fgf10<sup>+</sup>* progenitors stay in the tuberal region, which, in chick, is expanded in thickness. This observation is very similar to our results in *Hesx1<sup>Cre/+</sup>;Shh<sup>fl/fl</sup>* mutants (*Fgf8* and *Fgf10* are co-expressed in the

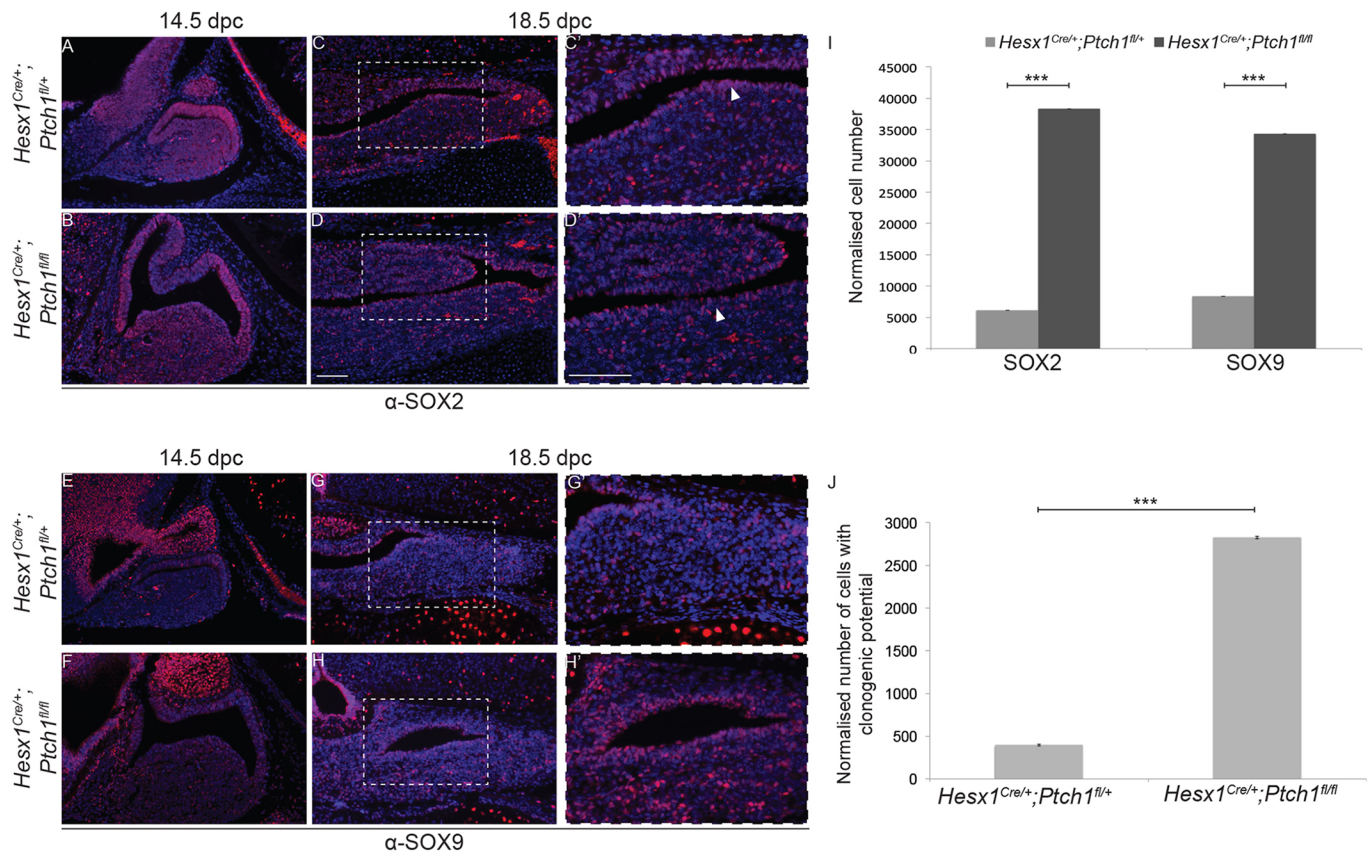

**Fig. 9. Increased numbers of SOX2<sup>+</sup> and SOX9<sup>+</sup> cells and enhanced clonogenic potential in *Hesx1<sup>Cre/+</sup>;Ptch1<sup>fl/fl</sup>* mutant pituitaries.** Immunofluorescence for SOX2 and SOX9 on mid-sagittal (A,B,E,F) and frontal (C,D,G,H) sections of control and *Hesx1<sup>Cre/+</sup>;Ptch1<sup>fl/fl</sup>* mutant embryos at 14.5 and 18.5 dpc. (A-D) SOX2 expression is comparable between genotypes at 14.5 dpc, but is clearly expanded in the *Hesx1<sup>Cre/+</sup>;Ptch1<sup>fl/fl</sup>* pituitary relative to the control at 18.5 dpc. Note the thicker marginal zone in the mutant (arrowheads in C' and D'). (C',D') Higher magnification of the boxed regions shown in C and D. (E-H) An expansion in SOX9 expression is observed in the mutant relative to the control pituitary at both 14.5 and 18.5 dpc. (G',H') Higher magnification of the boxed regions shown in G and H. (I) Quantitative analysis confirms the expansion of the SOX2<sup>+</sup> and SOX9<sup>+</sup> cell compartment at 18.5 dpc. (J) Quantification of the clonogenic potential of the pituitary in *Hesx1<sup>Cre/+</sup>;Ptch1<sup>fl/fl</sup>* mutants and control embryos at 18.5 dpc. A significant 3.4-fold increase is observed in the mutant pituitaries ( $n=6$ , \*\*\* $P<0.01$ ; data are mean $\pm$ s.d., Student's  $t$ -test). Scale bars: 100  $\mu$ m.

posterior hypothalamus in mice; Fig. S15) (Treier et al., 1998, 2001) and compatible with the phenotype observed by Zhao et al. (2012), where it was proposed that anterior hypothalamic SHH expression is essential to maintain crucial gene expression boundaries along the antero-posterior axis of the midline hypothalamus. In addition, Fu et al. (2017) show that the inhibition of the SHH pathway using cyclopamine results in failure to induce LHX3<sup>+</sup>/LHX4<sup>+</sup> RP progenitor identity, recapitulating our murine data and in agreement with experiments in zebrafish (Sbrogna et al., 2003).

Analyses of the *Ptch1*-deleted mutants support the idea that the SHH pathway promotes cell proliferation of LHX3<sup>+</sup>/LHX4<sup>+</sup> RP progenitors during pituitary development. Of note, we failed to identify increased proliferation at 11.5 dpc, suggesting that persistent proliferation of RP progenitors becomes apparent at developmental stages when they begin to exit the cell cycle and initiate differentiation (i.e. beyond 13.5-14.5 dpc) (Bilodeau et al., 2009; Davis et al., 2011). The consequence of maintained proliferation in periluminal progenitors beyond 14.5 dpc is the expansion of differentiated pituitary cells as well as the Sox2<sup>+</sup> stem cells. This finding is in agreement with *in vitro* data reported recently (Pyczek et al., 2016). In conclusion, our data support the mainstream role for the SHH pathway in the control of cell proliferation during pituitary development and, in addition, reveal an essential role for SHH in the specification of RP progenitors *in vivo*.

## MATERIALS AND METHODS

### Mice and human pituitaries

The *Hesx1<sup>Cre/+</sup>; Shh<sup>fl/fl</sup>* or *Ptch1<sup>fl/fl</sup>* mice have been described previously (Andoniadou et al., 2007; Uhmman et al., 2007). *Shh<sup>fl/fl</sup>* mice were obtained from the Jackson Laboratory (B6;129-Shhtm2Amc/J). All mouse experiments were carried out under UK Home Office and local ethical committee approval. Human embryonic samples were provided by the Joint MRC/Wellcome Trust Human Developmental Biology Resource. For further details, see the supplementary Materials and Methods.

### Histology and *in situ* hybridisation on histological sections

Histological sections were stained using Harris' Haematoxylin for morphology, as previously described (Andoniadou et al., 2011). *In situ* hybridisation was performed on paraffin wax-embedded histological sections as previously described (Sajedi et al., 2008). For further details, see the supplementary Materials and Methods.

### Cell counting *in vivo*

Cell counts *in vivo* were carried out in four to six non-consecutive histological sections immunostained with antibodies. pHH3-, SOX2- and SOX9-expressing cells were calculated from the percentage of positively stained cells as a proportion of the total number of DAPI-positive nuclei. A total of 1000-5000 DAPI-positive cells and 100-1000 marker-positive cells were counted for each genotype. Analysis of SOX2- and SOX9-positive cells was carried out by determining the relative proportion of marker-positive cells to total DAPI-positive nuclei in a section. These proportions were then

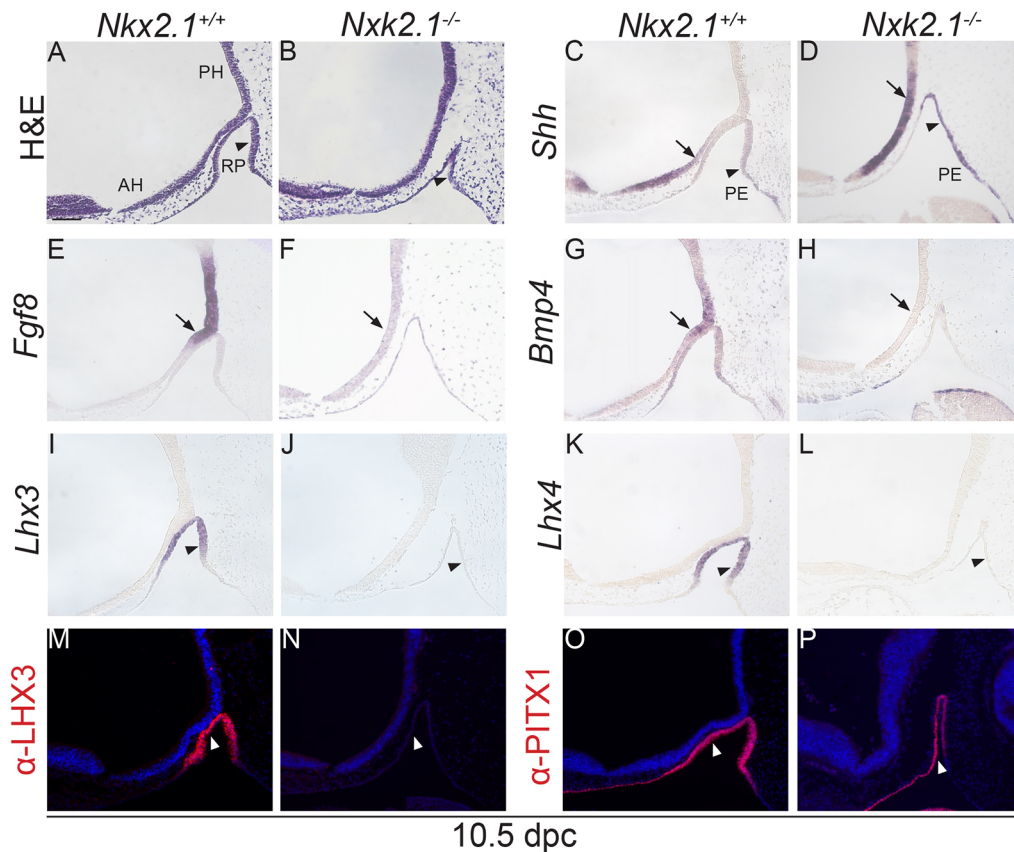

**Fig. 10. Failure to activate *Lhx3* and *Lhx4* expression in the developing RP of *Nkx2.1*<sup>-/-</sup> mutants.** Haematoxylin and Eosin and RNA *in situ* hybridisation on mid-sagittal sections of *Nkx2.1*<sup>-/-</sup> mutants and *Nkx2.1*<sup>+/+</sup> control embryos at 10.5 dpc. (A,B) Note that Rathke's pouch (RP) is hypoplastic in the *Nkx2.1*<sup>-/-</sup> mutant compared with the *Nkx2.1*<sup>+/+</sup> control embryo (arrowheads) and does not contact the overlying hypothalamus. (C,D) *Shh* transcripts are detected in the hypothalamus, but the expression domain is posteriorised in the mutant relative to the control embryo (arrows). Note the ectopic expression of *Shh* in the posterior region of RP in the mutant compared with the control embryo (arrowheads), suggesting an anteriorisation of the *Shh* expression domain in the pharyngeal endoderm (PE). (E-H) *Fgf8* and *Bmp4* expression domains in the posterior hypothalamus are completely lost in the mutant embryos (arrows). (I-L) *In situ* hybridisation revealing the total absence of both *Lhx3* and *Lhx4* expression in the RP of the mutants (arrowheads). (M-P) Immunostaining confirms the lack of LHX3 expression and reveals the expression of PITX1 in the mutant pituitary (arrowheads). RP, Rathke's pouch; PH, posterior hypothalamus; AH, anterior hypothalamus; PE, pharyngeal endoderm. Scale bar: 100  $\mu$ m.

applied to average cell counts of dissociated pituitaries to determine an approximate absolute number of these cell populations in the pituitary.

#### Immunofluorescence and RNAScope *in situ* hybridisation

Section immunostaining was carried out as previously described (Andoniadou et al., 2013). RNAScope *in situ* hybridisation was performed according to the manufacturer's protocol (Wang et al., 2012) with conditions adapted for mouse embryos (Lodge et al., 2016). Embryos were formalin fixed prior to processing and histological sections were cut at 5  $\mu$ m. The *Shh* mouse-specific probe, reagents and equipment were obtained from Advanced Cell Diagnostics. For further details, see the supplementary Materials and Methods.

#### RNA sequencing of dissected Rathke's pouch epithelium

RPs were manually dissected from mutant and control embryos at 10.5 dpc ( $n=2$  for each genotype). RNA sequencing was carried out at the Wellcome Trust Genomics Unit (Oxford University, UK). The data have been deposited in ArrayExpress ([www.ebi.ac.uk/arrayexpress/](http://www.ebi.ac.uk/arrayexpress/)) under accession number E-MTAB-5822. For further details, see the supplementary Materials and Methods.

#### Assessment of clonogenic potential

Clonogenic assays were performed on murine anterior pituitaries as previously described (Andoniadou et al., 2012, 2013). For further details, see the supplementary Materials and Methods.

#### Statistics

Mendelian ratios were calculated using the chi-squared test. Clonogenic potential of 18.5 dpc pituitaries and total cells counts *in vivo* were evaluated using an unpaired *t*-test.

#### Acknowledgements

We thank the Developmental Studies Hybridoma Bank (University of Iowa) and the National Hormone and Peptide Program (Harbor-University of California, Los Angeles Medical Center) for providing some of the antibodies used in this study. We thank Prof. James Briscoe for intellectual input and for sharing reagents.

#### Competing interests

The authors declare no competing or financial interests.

#### Author contributions

Conceptualization: C.L.A., J.P.M.-B.; Methodology: G.C., E.J.L., L.P., J.M.G.-M., S.H.; Software: J.R.A.; Validation: G.C.; Formal analysis: G.C., J.R.A.; Investigation: G.C., E.J.L., J.M.G.-M., S.H.; Resources: H.H.; Writing - original draft: G.C., J.P.M.-B.; Writing - review & editing: G.C., J.P.M.-B., H.H., C.L.A., J.M.G.-M., S.H., J.R.A., L.P., E.L.; Supervision: C.L.A., J.P.M.-B.

#### Funding

The human embryonic and fetal material was provided by the Joint Medical Research Council/Wellcome Trust Human Developmental Biology Resource ([www.hnbr.org](http://www.hnbr.org)) (099175/Z/12/Z). This research was funded by the Medical Research Council (MR/M000125/1 and MR/L016729/1); the National Institute for Health Research Biomedical Research Centre at Great Ormond Street Hospital for

Children; the University College London Hospitals NHS Foundation Trust; and Great Ormond Street Hospital Charity and CHILDREN with CANCER UK (W1055). G.C. was recipient of a Child Health Research Appeal Trust PhD fellowship. J.P.M.-B. is a Great Ormond Street Hospital Charity principal investigator. Deposited in PMC for release after 6 months.

#### Data availability

The data have been deposited in ArrayExpress ([www.ebi.ac.uk/arrayexpress/](http://www.ebi.ac.uk/arrayexpress/)) under the accession number E-MTAB-5822.

#### Supplementary information

Supplementary information available online at <http://dev.biologists.org/lookup/doi/10.1242/dev.153387.supplemental>

#### References

- Acampora, D., Mazan, S., Lallemand, Y., Avantaggiato, V., Maury, M., Simeone, A. and Brület, P.** (1995). Forebrain and midbrain regions are deleted in *Otx2*-mutants due to a defective anterior neuroectoderm specification during gastrulation. *Development* **121**, 3279–3290.
- Andersen, B. and Rosenfeld, M. G.** (2001). POU domain factors in the neuroendocrine system: lessons from developmental biology provide insights into human disease. *Endocr. Rev.* **22**, 2–35.
- Andoniadou, C. L., Signore, M., Sajedi, E., Gaston-Massuet, C., Kelberman, D., Burns, A. J., Itasaki, N., Dattani, M. and Martinez-Barbera, J. P.** (2007). Lack of the murine homeobox gene *Hesx1* leads to a posterior transformation of the anterior forebrain. *Development* **134**, 1499–1508.
- Andoniadou, C. L., Signore, M., Young, R. M., Gaston-Massuet, C., Wilson, S. W., Fuchs, E. and Martinez-Barbera, J. P.** (2011). *HESX1*- and *TCF3*-mediated repression of *Wnt1* *B*-catenin targets is required for normal development of the anterior forebrain. *Development* **138**, 4931–4942.
- Andoniadou, C. L., Gaston-Massuet, C., Reddy, R., Schneider, R. P., Blasco, M. A., Le, Tissier, P., Jacques, T. S., Pevny, L. H., Dattani, M. T. et al.** (2012). Identification of novel pathways involved in the pathogenesis of human adamantinomatous craniopharyngioma. *Acta Neuropathol.* **124**, 259–271.
- Andoniadou, C. L., Matsushima, D., Mousavy-gharavy, S. N., Signore, M., Mackintosh, A. I., Schaeffer, M., Gaston-massuet, C., Mollard, P., Jacques, T. S., Le Tissier, P. et al.** (2013). The *Sox2*+ population of the adult murine pituitary includes progenitor / stem cells with tumour-inducing potential. *Cell Stem Cell* **13**, 433–445.
- Bilodeau, S., Roussel-Gervais, A. and Drouin, J.** (2009). Distinct developmental roles of cell cycle inhibitors *p57Kip2* and *p27Kip1* distinguish pituitary progenitor cell cycle exit from cell cycle reentry of differentiated cells. *Mol. Cell. Biol.* **29**, 1895–1908.
- Burbridge, S., Stewart, I. and Placzek, M.** (2016). Development of the Neuroendocrine Hypothalamus. *Compr. Physiol.* **6**, 623–643.
- Castinetti, F., Davis, S. W., Brue, T. and Camper, S. A.** (2011). Pituitary stem cell update and potential implications for treating hypopituitarism. *Endocr. Rev.* **32**, 453–471.
- Charles, M. A., Suh, H., Hjalt, T. A., Drouin, J., Camper, S. A. and Gage, P. J.** (2005). *PITX* genes are required for cell survival and *Lhx3* activation. *Mol. Endocrinol.* **19**, 1893–1903.
- Dasen, J. S., Martinez Barbera, J.-P., Herman, T. S., Connell, S. O., Olson, L., Ju, B., Tollkuhn, J., Baek, S. H., Rose, D. W. and Rosenfeld, M. G.** (2001). Temporal regulation of a paired-like homeodomain repressor/TLE corepressor complex and a related activator is required for pituitary organogenesis. *Genes Dev.* **15**, 3193–3207.
- Davis, S. W. and Camper, S. A.** (2007). *Noggin* regulates *Bmp4* activity during pituitary induction. *Dev. Biol.* **305**, 145–160.
- Davis, S. W., Mortensen, A. H. and Camper, S. A.** (2011). Birthdating studies reshape models for pituitary gland cell specification. *Dev. Biol.* **352**, 215–227.
- De Moerloose, L., Spencer-Dene, B., Revest, J. M., Hajihosseini, M., Rosewell, I. and Dickson, C.** (2000). An important role for the IIIb isoform of fibroblast growth factor receptor 2 (FGFR2) in mesenchymal-epithelial signalling during mouse organogenesis. *Development* **127**, 483–492.
- Dutta, S., Dietrich, J.-E., Aspöck, G., Burdine, R. D., Schier, A., Westerfield, M. and Varga, Z. M.** (2005). *Pitx3* defines an equivalence domain for lens and anterior pituitary placode. *Development* **132**, 1579–1590.
- Ellsworth, B. S., Butts, D. L. and Camper, S. A.** (2008). Mechanisms underlying pituitary hypoplasia and failed cell specification in *Lhx3*-deficient mice. *Dev. Biol.* **313**, 118–129.
- Ericson, J., Norlin, S., Jessell, T. M. and Edlund, T.** (1998). Integrated FGF and BMP signaling controls the progression of progenitor cell differentiation and the emergence of pattern in the embryonic anterior pituitary. *Development* **125**, 1005–1015.
- Fu, T., Towers, M. and Placzek, M. A.** (2017). *Fgf10*<sup>+</sup> progenitors give rise to the chick hypothalamus by rostral and caudal growth and differentiation. *Development* **144**, 3278–3288.
- Gaston-Massuet, C., McCabe, M. J., Scagliotti, V., Young, R. M., Carreno, G., Gregory, L. C., Jayakody, S. A., Pozzi, S., Gualtieri, A., Basu, B. et al.** (2016). Transcription factor 7-like 1 is involved in hypothalamo–pituitary axis development in mice and humans. *Proc. Natl. Acad. Sci. USA* **113**, E548–E557.
- Gleiberman, A. S., Fedtsova, N. G. and Rosenfeld, M. G.** (1999). Tissue interactions in the induction of anterior pituitary: role of the ventral diencephalon, mesenchyme, and notochord. *Dev. Biol.* **213**, 340–353.
- Hendzel, M. J., Wei, Y., Mancini, M. A., Van Hooser, A., Ranalli, T., Brinkley, B. R., Bazett-Jones, D. P. and Allis, C. D.** (1997). Mitosis-specific phosphorylation of histone H3 initiates primarily within pericentromeric heterochromatin during G2 and spreads in an ordered fashion coincident with mitotic chromosome condensation. *Chromosoma* **106**, 348–360.
- Herzog, W., Zeng, X., Lele, Z., Sonntag, C., Ting, J.-W., Chang, C.-Y. and Hammerschmidt, M.** (2003). Adenohypophysis formation in the zebrafish and its dependence on sonic hedgehog. *Dev. Biol.* **254**, 36–49.
- Hogan, B. L., Beddington, R., Constantini, F. and Lacy, E.** (1994). *Manipulating the Mouse Embryo, a Laboratory Manual*. 2nd edn. pp. 24–25. Cold Spring Harbor, NY: Cold Spring Harbor Laboratory Press.
- Jayakody, S. A., Andoniadou, C. L., Gaston-massuet, C., Signore, M., Cariboni, A., Bouloux, P. M., Le Tissier, P., Pevny, L. H., Dattani, M. T. et al.** (2012). *SOX2* regulates the hypothalamic-pituitary axis at multiple levels. *J. Clin. Invest.* **122**, 3635–3646.
- Karlstrom, R. O., Talbot, W. S. and Schier, A. F.** (1999). Comparative synteny cloning of zebrafish *you-too*: mutations in the Hedgehog target *gli2* affect ventral forebrain patterning. *Genes Dev.* **13**, 388–393.
- Kelberman, D., Rizzoti, K., Lovell-Badge, R., Robinson, I. C. A. F. and Dattani, M. T.** (2009). Genetic regulation of pituitary gland development in human and mouse. *Endocr. Rev.* **30**, 790–829.
- Kimura, S., Hara, Y., Pineau, T., Fernandez-Salguero, P., Fox, C. H., Ward, J. M. and Gonzalez, F. J.** (1996). The *Tfeb* null mouse: thyroid-specific enhancer-binding protein is essential for the organogenesis of the thyroid, lung, ventral forebrain, and pituitary. *Genes Dev.* **10**, 60–69.
- Lodge, E. J., Russell, J. P., Patist, A. L., Francis-West, P. and Andoniadou, C. L.** (2016). Expression analysis of the hippo cascade indicates a role in pituitary stem cell development. *Front. Physiol.* **7**, 114.
- Minowada, G., Jarvis, L. A., Chi, C. L., Neubüser, A., Sun, X., Hacohen, N., Krasnow, M. A. and Martin, G. R.** (1999). Vertebrate *Sprouty* genes are induced by FGF signaling and can cause chondrodysplasia when overexpressed. *Development* **126**, 4465–4475.
- Mortensen, A. H., Schade, V., Lamonerie, T. and Camper, S. A.** (2015). Deletion of *OTX2* in neural ectoderm delays anterior pituitary development. *Hum. Mol. Genet.* **24**, 939–953.
- Norlin, S., Nordström, U. and Edlund, T.** (2000). Fibroblast growth factor signaling is required for the proliferation and patterning of progenitor cells in the developing anterior pituitary. *Mech. Dev.* **96**, 175–182.
- Ohuchi, H., Hori, Y., Yamasaki, M., Harada, H., Sekine, K., Kato, S. and Itoh, N.** (2000). FGF10 acts as a major ligand for FGF receptor 2 IIIb in mouse multi-organ development. *Biochem. Biophys. Res. Commun.* **277**, 643–649.
- Ozone, C., Suga, H., Eiraku, M., Kadoshima, T., Yonemura, S., Takata, N., Oiso, Y., Tsuji, T. and Sasai, Y.** (2016). Functional anterior pituitary generated in self-organizing culture of human embryonic stem cells. *Nat. Commun.* **7**, 10351.
- Park, H. L., Bai, C., Platt, K. A., Matise, M. P., Beeghly, A., Hui, C. C., Nakashima, M., Joyner, A. L., Alexandre, C., Jacinto, A. et al.** (2000). Mouse *Gli1* mutants are viable but have defects in SHH signaling in combination with a *Gli2* mutation. *Development* **127**, 1593–1605.
- Pyczek, J., Buslei, R., Schult, D., Hölsken, A., Buchfelder, M., Heß, I., Hahn, H., Uhmann, A., Hooper, J. E., Scott, M. P. et al.** (2016). Hedgehog signaling activation induces stem cell proliferation and hormone release in the adult pituitary gland. *Sci. Rep.* **6**, 24928.
- Raetzman, L. T., Ward, R. and Camper, S. A.** (2002). *Lhx4* and *Prop1* are required for cell survival and expansion of the pituitary primordia. *Development* **129**, 4229–4239.
- Revest, J.-M., Spencer-Dene, B., Kerr, K., De Moerloose, L., Rosewell, I. and Dickson, C.** (2001). Fibroblast growth factor receptor 2-IIIb acts upstream of *Shh* and *Fgf4* and is required for limb bud maintenance but not for the induction of *Fgf8*, *Fgf10*, *Mx1*, or *Bmp4*. *Dev. Biol.* **231**, 47–62.
- Rizzoti, K.** (2015). Genetic regulation of murine pituitary development. *J. Mol. Endocrinol.* **54**, R55–R73.
- Rizzoti, K., Akiyama, H. and Lovell-Badge, R.** (2013). Mobilized adult pituitary stem cells contribute to endocrine regeneration in response to physiological demand. *Cell Stem Cell* **13**, 419–432.
- Sajedi, E., Gaston-Massuet, C., Signore, M., Andoniadou, C. L., Kelberman, D., Castro, S., Etchevers, H. C., Gerrelli, D., Dattani, M. T. and Martinez-Barbera, J. P.** (2008). Analysis of mouse models carrying the I26T and R160C substitutions in the transcriptional repressor *HESX1* as models for septo-optic dysplasia and hypopituitarism. *Dis. Model. Mech.* **1**, 241–254.
- Sbrogna, J. L., Barresi, M. J. F. and Karlstrom, R. O.** (2003). Multiple roles for Hedgehog signaling in zebrafish pituitary development. *Dev. Biol.* **254**, 19–35.
- Sheng, H. Z., Zhadanov, A. B., Mosinger, B., Fujii, T., Bertuzzi, S., Grinberg, A., Lee, E. J., Huang, S.-P., Mahon, K. A., Westphal, H. et al.** (1996). Specification

- of pituitary cell lineages by the LIM homeobox gene Lhx3. *Science* **272**, 1004-1007.
- Sheng, H. Z., Moriyama, K., Yamashita, T., Li, H., Potter, S. S., Mahon, K. A. and Westphal, H.** (1997). Multistep control of pituitary organogenesis. *Science* **278**, 1809-1812.
- Shimogori, T., Lee, D. A., Miranda-Angulo, A., Yang, Y., Wang, H., Jiang, L., Yoshida, A. C., Kataoka, A., Mashiko, H., Avetisyan, M. et al.** (2010). A genomic atlas of mouse hypothalamic development. *Nat. Neurosci.* **13**, 767-775.
- Suga, H., Kadoshima, T., Minaguchi, M., Ohgushi, M., Soen, M., Nakano, T., Takata, N., Wataya, T., Muguruma, K., Miyoshi, H. et al.** (2011). Self-formation of functional adenohypophysis in three-dimensional culture. *Nature* **480**, 57-62.
- Suh, H., Gage, P. J., Drouin, J. and Camper, S. A.** (2002). Pitx2 is required at multiple stages of pituitary organogenesis: pituitary primordium formation and cell specification. *Development* **129**, 329-337.
- Tajima, T., Ohtake, A., Hoshino, M., Amemiya, S., Sasaki, N., Ishizu, K. and Fujieda, K.** (2009). OTX2 loss of function mutation causes anophthalmia and combined pituitary hormone deficiency with a small anterior and ectopic posterior pituitary. *J. Clin. Endocrinol. Metab.* **94**, 314-319.
- Takuma, N., Sheng, H. Z., Furuta, Y., Ward, J. M., Sharma, K., Hogan, B. L., Pfaff, S. L., Westphal, H., Kimura, S. and Mahon, K. A.** (1998). Formation of Rathke's pouch requires dual induction from the diencephalon. *Development* **125**, 4835-4840.
- Tefft, J. D., Lee, M., Smith, S., Leinwand, M., Zhao, J., Bringas, P., Crowe, D. L. and Warburton, D.** (1999). Conserved function of mSpry-2, a murine homolog of *Drosophila* sprouty, which negatively modulates respiratory organogenesis. *Curr. Biol.* **9**, 219-222.
- Treier, M., Gleiberman, A. S., O'Connell, S. M., Szeto, D. P., McMahon, J. A., McMahon, A. P. and Rosenfeld, M. G.** (1998). Multistep signaling requirements for pituitary organogenesis in vivo. *Genes Dev.* **12**, 1691-1704.
- Treier, M., O'Connell, S., Gleiberman, A., Price, J., Szeto, D. P., Burgess, R., Chuang, P. T., McMahon, A. P. and Rosenfeld, M. G.** (2001). Hedgehog signaling is required for pituitary gland development. *Development* **128**, 377-386.
- Trowe, M.-O., Zhao, L., Weiss, A.-C., Christoffels, V., Epstein, D. J. and Kispert, A.** (2013). Inhibition of Sox2-dependent activation of Shh in the ventral diencephalon by Tbx3 is required for formation of the neurohypophysis. *Development* **140**, 2299-2309.
- Turner, N. and Grose, R.** (2010). Fibroblast growth factor signalling: from development to cancer. *Nat. Rev. Cancer* **10**, 116-129.
- Uhmman, A., Dittmann, K., Nitzki, F., Dressel, R., Koleva, M., Frommhold, A., Zibat, A., Binder, C., Adham, I., Nitsche, M. et al.** (2007). The Hedgehog receptor Patched controls lymphoid lineage commitment. *Blood* **110**, 1814-1823.
- Vankelecom, H.** (2010). Pituitary stem/progenitor cells: embryonic players in the adult gland? *Eur. J. Neurosci.* **32**, 2063-2081.
- Wang, Y., Martin, J. F. and Bai, C. B.** (2010). Direct and indirect requirements of Shh/Gli signaling in early pituitary development. *Dev. Biol.* **348**, 199-209.
- Wang, F., Flanagan, J., Su, N., Wang, L.-C., Bui, S., Nielson, A., Wu, X., Vo, H.-T., Ma, X.-J. and Luo, Y.** (2012). RNAscope: a novel in situ RNA analysis platform for formalin-fixed, paraffin-embedded tissues. *J. Mol. Diagn.* **14**, 22-29.
- Wolf, B. B., Schuler, M., Echeverri, F. and Green, D. R.** (1999). Caspase-3 is the primary activator of apoptotic DNA fragmentation via DNA fragmentation factor-45/inhibitor of caspase-activated DNase inactivation. *J. Biol. Chem.* **274**, 30651-30656.
- Xavier, G. M., Seppala, M., Barrell, W., Birjandi, A. A., Geoghegan, F. and Cobourne, M. T.** (2016). Hedgehog receptor function during craniofacial development. *Dev. Biol.* **415**, 198-215.
- Zhao, Y., Morales, D. C., Hermes, E., Lee, W.-K., Pfaff, S. L. and Westphal, H.** (2006). Reduced expression of the LIM-homeobox gene Lhx3 impairs growth and differentiation of Rathke's pouch and increases cell apoptosis during mouse pituitary development. *Mech. Dev.* **123**, 605-613.
- Zhao, L., Zevallos, S. E., Rizzoti, K., Jeong, Y., Lovell-Badge, R. and Epstein, D. J.** (2012). Disruption of SoxB1-dependent Sonic hedgehog expression in the hypothalamus causes septo-optic dysplasia. *Dev. Cell* **22**, 585-596.
